# Supplementary material
Source: ML conference proceedings conference paper supplement (https://proceedings.neurips.cc/paper_files/paper/2023/hash/5f9bfdfe3685e4ccdbc0e7fb29cccf2a-Abstract.html)
Supplement: Supplementary file 1 [file 5f9bfdfe3685e4ccdbc0e7fb29cccf2a-Supplemental-Conference.pdf]

---

# Supplementary Materials: *SimMTM: A Simple Pre-Training Framework for Masked Time-Series Modeling*

---

Anonymous Author(s)

Affiliation

Address

email

## 1 A Implementation Details

2 All the experiments are repeated five times, implemented in PyTorch [12] and conducted on NVIDIA  
3 A100 SXM4 40GB GPU. We implement the baselines based on their official implementation and  
4 follow the configuration from their original papers. For the metrics, we adopt the mean square error  
5 (MSE) and mean absolute error (MAE) for the time series forecasting. As for the classification,  
6 accuracy, precision, recall, F1 score, and their average value are recorded.

### 7 A.1 Dataset Description

8 We conduct experiments to evaluate the effect of our method under in-domain and cross-domain  
9 settings on twelve real-world datasets for two typical time series analysis tasks: forecasting and  
10 classification, covering diverse application scenarios (electricity system, neurological healthcare,  
11 human activity recognition, mechanical fault detection, and physical status monitoring), different  
12 types of signals (ECG, EMG, acceleration, vibration, power load, weather, and transportation),  
13 multivariate channel dimensions (from 1 to 862), varying times series lengths (from 96 to 5120) and  
14 large span sampling ratio (from 100 Hz to 4000 Hz). The detailed descriptions of these datasets are  
15 summarized in Table 1.

16 (1) **ETT (4 subsets)** [26] contains the time series of oil temperature and power load collected by  
17 electricity transformers from July 2016 to July 2018. ETT is a group of four subsets with different  
18 recorded frequencies: ETTh1/ETTh2 are recorded every hour, and ETTm1/ETTM2 are recorded  
19 every 15 minutes.

20 (2) **WEATHER** [18] includes meteorological time series with 21 weather indicators collected every  
21 10 minutes from the Weather Station of the Max Planck Biogeochemistry Institute in 2020.

22 (3) **ELECTRICITY** [15] records the hourly electricity consumption of 321 clients from 2012 to  
23 2014. Values are in kW of each 15 min. All time labels report to Portuguese hour. However, all days  
24 present 96 measures (24×4). For every year in March, time change day (which has only 23 hours),  
25 values between 1:00 am and 2:00 am are zero for all points. For every year in October, time change  
26 day (which has 25 hours), the values between 1:00 am and 2:00 am aggregated consumption of two  
27 hours.

28 (4) **TRAFFIC** [13] encompasses the hourly measures of road occupancy rates obtained from 862  
29 sensors situated in the San Francisco Bay area freeways. These measurements were carried out  
30 between January 2015 and December 2016.

31 (5) **SLEEPEEG** [6] contains 153 whole-night sleeping electroencephalography (EEG) recordings  
32 from 82 healthy subjects. We follow the same data preprocessing approach as [25] to segment the  
33 EEG signals without overlapping and get 371,055 univariate brainwaves. Each brainwave is sampled

Table 1: Dataset descriptions. *Samples* are organized in (Train/Validation/Test).

| Tasks          | Datasets    | Channels | Length           | Samples           | Classes | Information      | Frequency |
|----------------|-------------|----------|------------------|-------------------|---------|------------------|-----------|
| Forecasting    | ETTh1,ETTh2 | 7        | {96,192,336,720} | 8545/2881/2881    | -       | Electricity      | 1 Hour    |
|                | ETTh1,ETTh2 | 7        | {96,192,336,720} | 34465/11521/11521 | -       | Electricity      | 15 Mins   |
|                | Weather     | 21       | {96,192,336,720} | 36792/5271/10540  | -       | Weather          | 10 Mins   |
|                | Electricity | 321      | {96,192,336,720} | 18317/2633/5261   | -       | Electricity      | 1 Hour    |
|                | Traffic     | 862      | {96,192,336,720} | 12185/1757/3509   | -       | Transportation   | 1 Hour    |
| Classification | SleepEEG    | 1        | 200              | 371005/-/-        | 5       | EEG              | 100 Hz    |
|                | Epilepsy    | 1        | 178              | 60/20/11420       | 2       | EEG              | 174 Hz    |
|                | FD-B        | 1        | 5120             | 60/21/135599      | 3       | Faulty Detection | 64K Hz    |
|                | Gesture     | 3        | 315              | 320/120/120       | 8       | Hand Movement    | 100 Hz    |
|                | EMG         | 1        | 1500             | 122/41/41         | 3       | Muscle responses | 4K Hz     |

34 at a frequency of 100 Hz and associated with one of five sleeping stages: Wake, Non-rapid eye  
 35 movement (3 sub-states), and Rapid Eye Movement.

36 (6) **EPILEPSY** [1] monitors the brain activities of 500 subjects with a single-channel EEG sensor.  
 37 Every subject is recorded for 23.6 seconds of brain activities. The dataset is sampled at 178 Hz and  
 38 contains 11,500 samples in total. We follow the procedure described by [25]. The first four classes  
 39 (eyes open, eyes closed, EEG measured in the healthy brain region, and EEG measured in the tumor  
 40 region) of the original five categories of each sample are classified as positive, and the remaining  
 41 classes (whether the subject has a seizure episode) are used as negative.

42 (7) **FD-B** [7] is generated by electromechanical drive systems. It monitors the condition of rolling  
 43 bearings and detects their failures based on the monitoring conditions, which include speed, load  
 44 torque, and radial force. Concretely, FD-B has 13,640 samples in total. Each recording is sampled at  
 45 64k Hz with 3-class labels: undamaged, inner damaged, and outer damaged.

46 (8) **GESTURE** [9] are collected from 8 hand gestures based on the paths of hand movement recorded  
 47 by an accelerometer. The eight gestures are hand swiping left, right, up, and down, hand waving in a  
 48 counterclockwise or clockwise circle, hand waving in a square, and waving a right arrow, respectively.  
 49 This dataset contains 440 examples of balanced classification labels that can be used, and each sample  
 50 includes eight different kinds of gesture categories.

51 (9) **EMG** [14] is sampled with 4K Hz and consists of 163 single-channel EMG recordings from the  
 52 anterior tibialis muscle of three healthy volunteers suffering from neuropathy and myopathy. Each  
 53 patient is a classification category, so each sample is associated with one of three classes.

## 54 A.2 Baselines Implementation

55 We compare our proposed SimMTM against six state-of-the-art baselines. To make a fair and  
 56 comprehensive comparison, we tried two baseline implementation approaches for forecasting and  
 57 classification tasks: the unified encoder and reproduced with their official implementation encoder.  
 58 Notably, the designs of LaST [17] and TF-C [25] are closely related to model structures. We directly  
 59 report results from their papers or reproduce codes with official implementation.

60 (1) **Unified encoder.** We attempt to unify the encoder for these pre-training methods. Specifically,  
 61 we adopt the vanilla Transformer [16] with channel independent [11] for forecasting to accomplish  
 62 cross-domain transfer between datasets with different variate numbers. As for the classification, we  
 63 use 1D-ResNet [5] as the encoder following [25]. Besides, we do a comprehensive hyperparameter

Table 2: Baselines implementation details.

| Baselines   | Task           | Encoder                         | Performance Comparison | Report    |
|-------------|----------------|---------------------------------|------------------------|-----------|
| Ti-MAE [8]  | Forecasting    | Channel-independent Transformer | <b>better</b>          | Main text |
|             |                | Official implementation         |                        | Section E |
|             | Classification | 1D-ResNet                       | <b>better</b>          | Main text |
|             |                | Official implementation         |                        | Section E |
| TST [24]    | Forecasting    | Channel-independent Transformer | <b>better</b>          | Main text |
|             |                | Official implementation         |                        | Section E |
|             | Classification | 1D-ResNet                       | <b>better</b>          | Main text |
|             |                | Official implementation         |                        | Section E |
| LaST [17]   | Forecasting    | Official implementation         | /                      | Main text |
|             | Classification | Official implementation         | /                      | Main text |
| TF-C [25]   | Forecasting    | Official implementation         | /                      | Main text |
|             | Classification | Official implementation         | /                      | Main text |
| CoST [20]   | Forecasting    | Channel-independent Transformer | <b>better</b>          | Main text |
|             |                | Official implementation         |                        | Section E |
|             | Classification | 1D-ResNet                       | <b>better</b>          | Main text |
|             |                | Official implementation         |                        | Section E |
| TS2Vec [23] | Forecasting    | Channel-independent Transformer | <b>better</b>          | Main text |
|             |                | Official implementation         |                        | Section E |
|             | Classification | 1D-ResNet                       | <b>better</b>          | Main text |
|             |                | Official implementation         |                        | Section E |

64 search for all baselines. For the Transformer encoder, we vary the number of Transformer layers  
65 in  $\{1, 2, 3, 4\}$ , select the model dimension from  $\{16, 32, 64, 128, 256\}$ , and the attention head from  
66  $\{4, 8, 16, 32\}$ . For the 1D-ResNet, we search the number of 1D-ResNet layers from  $\{1, 2, 3, 4\}$ , the  
67 kernel size from  $\{3, 5, 8\}$  respectively. Additionally, for the masked modeling methods TST [24],  
68 Ti-MAE [8], we also searched the masked ratio  $r = \{0.125, 0.25, 0.5, 0.75\}$  for better performance.

69 (2) **Official implementation.** We also implement the baselines following the corresponding official  
70 codes, including encoder, hyperparameters, etc. The comparisons are included in Section E of this  
71 supplementary material. We directly report the results from their original papers for the same set. For  
72 mismatched settings, the results are from our implementation.

73 Finally, for baselines Ti-MAE [8], TST [24], CoST [20], and TS2Vec [23], we report the results based  
74 on the unified encoder in the main text. But for baselines LaST [17] and TF-C [25], we report the  
75 results of the official code implementation or their original paper, which are limited by their model  
76 structures. As a result, the performances of all baselines with unified encoder (that we reported in  
77 the main text) generally surpass their official implementation and results reported in their own paper.  
78 Table 2 shows more details. Full experimental results are in Section E.

### 79 A.3 Pre-training and Fine-tuning Configuration

80 We built two types of pre-training and fine-tuning scenarios, in-domain and cross-domain, based on  
81 the benchmarks of forecasting and classification tasks to compare the effectiveness of our method  
82 and other time series pre-training methods.

83 We pre-train a model on one subset for forecasting tasks and fine-tune it to the same dataset to  
84 build seven in-domain transfer evaluation scenarios. In cross-domain evaluation, we pre-train a  
85 model on one specific dataset and then use the other datasets for fine-tuning. Based on the above  
86 settings, we constructed fifteen in-domain and cross-domain pre-training and fine-tuning experiments,  
87 covering the same dataset with the same sampled frequency, different datasets with the same sampled  
88 frequency, and different datasets with different sampled frequencies.

Table 3: Pre-training and fine-tuning scenarios for time series forecasting (Fore.) and classification (Class.) tasks, including the same and different datasets and in- and cross-domain settings.

| Tasks  | Evaluation   | Scenarios                                             | Characteristic                                 |
|--------|--------------|-------------------------------------------------------|------------------------------------------------|
| Fore.  | In-domain    | ETTh1 $\rightarrow$ ETTh1                             | The same dataset with the same frequency       |
|        |              | ETTh2 $\rightarrow$ ETTh2                             |                                                |
|        |              | ETTh1 $\rightarrow$ ETTh2                             |                                                |
| Fore.  | Cross-domain | ETTh1 $\rightarrow$ ETTh2                             | Different datasets with the same frequency.    |
|        |              | ETTh2 $\rightarrow$ ETTh1                             |                                                |
|        |              | ETTh2 $\rightarrow$ ETTh1                             |                                                |
| Fore.  | Cross-domain | {ETTh1, ETTh2, Weather} $\rightarrow$ ETTh1           | Different datasets with different frequencies. |
|        |              | {ETTh1, ETTh2, Weather} $\rightarrow$ ETTh2           |                                                |
| Class. | In-domain    | Epilepsy $\rightarrow$ Epilepsy                       | The same dataset with the same frequency.      |
|        | Cross-domain | SleepEEG $\rightarrow$ {Epilepsy, FD-B, Gesture, EMG} | Different datasets with different frequencies. |

89 We use the same dataset, Epilepsy, to construct the in-domain setting for classification tasks. For the  
90 cross-domain setting, we pre-train a model for classification tasks on a univariate time series dataset  
91 SleepEEG with the most complex temporal dynamics and the most samples. And then fine-tune  
92 the model separately on Epilepsy, FD-B, Gesture, and EMG. Furthermore, we constructed four  
93 cross-domain evaluation scenarios by pre-training from SleepEEG and fine-tuning to Epilepsy, FD-B,  
94 Gesture, and EMG because of fewer commonalities and the enormous gap among these datasets.  
95 Table 3 shows detailed pre-training and fine-tuning settings.

96 **A.4 Model and Training Configuration**

97 Following the previous convention, we choose the encoder part of Transformer [16] with channel  
98 independent as the feature extractor for forecasting tasks. For the classification tasks, we adopt  
99 1D-ResNet [5] as the encoder following [25]. In the pre-training stages, we pre-train the model  
100 with different learning rates and batch sizes according to the pre-train datasets. Then we fine-tune  
101 it to downstream forecasting and classification tasks supervised by L2 and Cross-Entropy losses,  
102 respectively. The configuration details are in Table 4.

Table 4: Model and training configuration in Forecasting (Fore.) and Classification (Class.) tasks.

| Tasks  | Encoder      |             | Pre-training  |            |        | Fine-tuning   |               |            |        |
|--------|--------------|-------------|---------------|------------|--------|---------------|---------------|------------|--------|
|        | $e_{layers}$ | $d_{model}$ | learning rate | batch size | epochs | learning rate | loss function | batch size | epochs |
| Fore.  | 2            | 16          | 1e-3          | 32         | 50     | 1e-4          | L2            | {16,32}    | 10     |
| Class. | 3            | 128         | 1e-4          | 128        | 10     | 1e-4          | Cross-Entropy | 32         | 300    |

## 103 B Hyperparameter Sensitivity

104 We verify the hyperparameter sensitivity of the proposed time series pre-training method SimMTM  
 105 on ETTh1 in Table 5, including masked ratio ( $r$ ), the number of masked series ( $M$ ), temperature ( $\tau$ ),  
 106 masked function (Mask), encoder depth ( $e_{\text{layers}}$ ), and the hidden dimension ( $d_{\text{model}}$ ). Lower MSE  
 107 and MAE represent better performance.

108 As shown in Table 5 (a) and 5 (b), we can observe the effect of the method is closely related to  
 109 the trade-off of the masked ratio and the number of masked series. Hence, a reasonable balance  
 110 between the two kinds of parameters is critical. For the temperature hyperparameter of softmax  
 111 normalization ( $\tau$ ), we use an appropriately small  $\tau$  that leads to higher differences and diversity of  
 112 masked sequences. For the masked methods, we chose two masked methods for verification: masking  
 113 following random distribution and masking following geometric distribution [24]. The results show  
 114 that the method based on geometric masking is better than random masking modeling. Besides,  
 115 we can find that 2 encoder layers are enough for reconstruction tasks. Note our method SimMTM  
 116 consistently performs better than training from scratch under various hyperparameter changes.

Table 5: Hyperparameter sensitivity experiments on ETTh1 for the in-domain setting. The entries marked in bold are the same which specify the default settings. This table format follows [4].

| (a) Masked ratio    |              |              | (b) Masked numbers |              |              | (c) Temperature            |              |              |
|---------------------|--------------|--------------|--------------------|--------------|--------------|----------------------------|--------------|--------------|
| Ratio               | MSE          | MAE          | Numbers            | MSE          | MAE          | Value                      | MSE          | MAE          |
| 12.5%               | 0.429        | 0.440        | 1                  | 0.429        | 0.437        | 0.02                       | <b>0.409</b> | <b>0.428</b> |
| 25%                 | 0.427        | 0.434        | 2                  | 0.416        | 0.429        | 0.2                        | <b>0.409</b> | 0.429        |
| 50%                 | <b>0.409</b> | <b>0.428</b> | 3                  | <b>0.409</b> | <b>0.428</b> | 2                          | 0.416        | 0.428        |
| 75%                 | 0.422        | 0.434        | 4                  | 0.419        | 0.431        |                            |              |              |
| (d) Masked function |              |              | (e) Encoder depth  |              |              | (f) Hidden layer dimension |              |              |
| Type                | MSE          | MAE          | Layers             | MSE          | MAE          | Dim                        | MSE          | MAE          |
| Random              | 0.409        | 0.431        | 1                  | 0.420        | 0.426        | 16                         | <b>0.409</b> | <b>0.428</b> |
| Geometric           | <b>0.409</b> | <b>0.428</b> | 2                  | <b>0.409</b> | <b>0.428</b> | 32                         | 0.420        | 0.432        |
|                     |              |              | 3                  | 0.421        | 0.430        | 64                         | 0.422        | 0.434        |
|                     |              |              | 4                  | 0.426        | 0.436        | 128                        | 0.428        | 0.444        |

## 117 C Ablations on Aggregation Setting

118 SimMTM proposes to recover masked time points by the weighted aggregation of multiple neighbors  
 119 outside the manifold. We explored two types of aggregation settings.

120 (1) **Positive Samples Aggregation (PSA)**: only aggregate multiple positive neighbors (the masked  
 121 series of the same sample) to reconstruct masked time points.

122 (2) **Positive and Negative Samples Aggregation (PNSA)**: aggregate both positive and negative  
 123 neighbors (the masked series of all samples) to reconstruct masked time points.

124 As shown in Table 6, although PSA made good progress compared to training from scratch (Random  
 125 Init.), PNSA is consistently better than SimMTM PSA in all ablation settings. In masked time-series  
 126 modeling, masking can be viewed as adding noise to the original data, and masked modeling is  
 127 to project masked data from the neighborhood back to the original manifold. We use positive and  
 128 negative masked time series as the reconstruction candidates to drive the model to select the positive  
 129 samples adaptively, which can make the model learn the structure of the manifold better. Therefore,  
 130 as stated in the Method Section of the main text, we choose positive and negative sample aggregation  
 131 (PNSA) as the standard aggregation setting of SimMTM.

Table 6: Ablations on aggregation setting in forecasting ( $MSE$ ) and classification ( $Acc$ ) tasks for in- and cross-domain settings. A smaller MSE or a higher Accuracy indicates a better result ( $\uparrow$ ).

| Tasks          | Evaluation   | Scenarios                       | Aggregation   | Metric                             |
|----------------|--------------|---------------------------------|---------------|------------------------------------|
| Forecasting    | In-domain    | ETTh1 $\rightarrow$ ETTh1       | Random init.  | 0.431                              |
|                |              |                                 | SimMTM (PSA)  | 0.420 $\uparrow$                   |
|                | Cross-domain | ETTh2 $\rightarrow$ ETTh1       | Random init.  | 0.431                              |
|                |              |                                 | SimMTM (PNSA) | <b>0.415 <math>\uparrow</math></b> |
| Classification | In-domain    | Epilepsy $\rightarrow$ Epilepsy | Random init.  | 89.83                              |
|                |              |                                 | SimMTM (PSA)  | 92.56 $\uparrow$                   |
|                | Cross-domain | SleepEEG $\rightarrow$ EMG      | Random init.  | 77.80                              |
|                |              |                                 | SimMTM (PNSA) | <b>97.56 <math>\uparrow</math></b> |

## 132 D Comparison of Masked Modeling

133 To investigate the reconstruction process of different masked modeling methods, we plot both  
 134 original and reconstructed time series from TST and SimMTM in Figure 1, where TST [24] follows  
 135 the canonical masked modeling paradigm and learns to predict removed time points based on the  
 136 remaining time points. In Figure 1, we can find that direct reconstruction is too difficult in time  
 137 series, even for the 12.5% masking ratio. As for the 75% masking ratio, TST degenerates more  
 138 seriously. Because of this poor reconstruction effect, direct reconstruction is difficult to provide  
 139 reliable guidance to model pre-training. In contrast, our proposed SimMTM can precisely reconstruct  
 140 the original time series, benefiting the representation learning. These results also support our design  
 141 in neighborhood reconstruction.

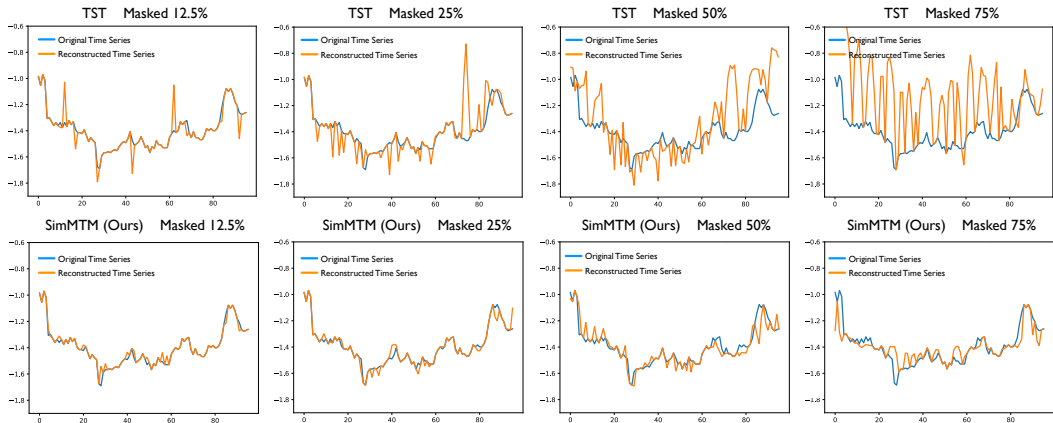

Figure 1: Comparison of the canonical masked modeling paradigm TST and neighborhood aggregation masked modeling SimMTM in reconstructing time series. All the cases are shown from ETTh1.

142 **E Full Results**

143 Due to the limited length of the text, we summarize all the experiments in the main text into two parts:  
 144 the main experiment and the analytical experiment. We categorize and index them in Tabel 7, 8.

Table 7: The main results of pre-training and fine-tuning scenarios for time series forecasting and classification tasks, including the same and different encoder for in- and cross-domain settings.

| Tasks          | Evaluation   | Encoder                                   | Labels Name |
|----------------|--------------|-------------------------------------------|-------------|
| Forecasting    | In-domain    | The model utilized in the original papers | Table 9     |
|                |              | Transformer with channel independent      | Table 10    |
|                | Cross-domain | The model utilized in the original papers | Table 11    |
|                |              | Transformer with channel independent      | Table 12    |
| Classification | In-domain    | The model utilized in the original papers | Table 17    |
|                |              | 1D-ResNet                                 | Table 18    |
|                | Cross-domain | The model utilized in the original papers | Table 17    |
|                |              | 1D-ResNet                                 | Table 18    |

Table 8: The model analysis results of pre-training and fine-tuning scenarios for time series forecasting and classification tasks with the unified encoder for in- and cross-domain settings.

| Tasks          | Evaluation   | Analysis         | Labels Name |
|----------------|--------------|------------------|-------------|
| Forecasting    | In-domain    | Ablation study   | Table 13    |
|                |              | Model generality | Table 15    |
|                | Cross-domain | Ablation study   | Table 14    |
|                |              | Limited data     | Table 16    |
| Classification | In-domain    | Ablation study   | Table 19    |
|                | Cross-domain | Ablation study   | Table 19    |

145 **F Limitations**

146 SimMTM is inspired by the manifold perspective of masked modeling. Although we have provided  
 147 relatively comprehensive results to verify the model’s effectiveness, the model performance still  
 148 needs theoretical guarantees. In fact, the most high-impact works in the self-supervised pre-training  
 149 community are without theoretical analysis, such as BERT [2], GPT-3 [3], MAE [4] and SimMIM  
 150 [22]. Thus, we would like to leave this problem as a future work.

151 The masking ratio of masked modeling methods is an essential hyper-parameter. Although we have  
 152 provided a chosen principle to masking ratio  $r$  and the number of masked time series  $M$  as  $M \propto r$   
 153 in the main text, we still need to tune these two hyperparameters for different datasets to achieve the best  
 154 performance. Notably, previous methods also chose the masking ratio solely based on the empirical  
 155 results [2, 4]. Thus, despite there exist limitations of SimMTM in choosing hyperparameters, the  
 156 principle of  $M \propto r$  can somewhat ease this problem. And the chosen strategy of the masking ratio  
 157 can also be a potential topic in masked modeling [19].

158 **G Social Impacts**

159 This paper presents SimMTM as a new masked modeling method for time series. SimMTM achieves  
 160 state-of-the-art in two mainstream time series analysis tasks, which can be a good supplement for the  
 161 self-supervised pre-training community. We will also publish the codebase of time-series pre-training  
 162 to facilitate future research.

163 This paper only focuses on the algorithm design. Using all the codes and datasets strictly follows the  
 164 corresponding licenses (Appendix A.1). There is no potential ethical risk or negative social impact.

Table 9: Complete results of long-term forecasting tasks for the in-domain setting of forecasting the future  $O \in \{96, 192, 336, 720\}$  time points based on the past 336 time points. **All the results of baselines are based on the encoder utilized in their original papers.** The standard deviations of SimMTM are within 0.005 for MSE and within 0.004 for MAE.

| Models      | SimMTM  | Random init.       | Ti-MAE [8]         | TST [24]    | LaST [17]   | TF-C [25]          | CoST [20]   | TS2Vec [23] |             |
|-------------|---------|--------------------|--------------------|-------------|-------------|--------------------|-------------|-------------|-------------|
| Metric      | MSE MAE | MSE MAE            | MSE MAE            | MSE MAE     | MSE MAE     | MSE MAE            | MSE MAE     | MSE MAE     |             |
| ETTh1       | 96      | <b>0.379 0.407</b> | 0.380 0.412        | 0.708 0.570 | 0.503 0.527 | 0.399 0.412        | 0.463 0.406 | 0.514 0.512 | 0.709 0.650 |
|             | 192     | <b>0.412 0.424</b> | 0.416 0.434        | 0.725 0.587 | 0.601 0.552 | 0.484 0.468        | 0.531 0.540 | 0.655 0.590 | 0.927 0.757 |
|             | 336     | <b>0.421 0.431</b> | 0.448 0.458        | 0.713 0.589 | 0.625 0.541 | 0.580 0.533        | 0.535 0.545 | 0.790 0.666 | 0.986 0.811 |
|             | 720     | <b>0.424 0.449</b> | 0.481 0.487        | 0.736 0.618 | 0.768 0.628 | 0.432 <b>0.432</b> | 0.577 0.562 | 0.880 0.739 | 0.967 0.790 |
|             | Avg     | <b>0.409 0.428</b> | 0.431 0.448        | 0.721 0.591 | 0.624 0.562 | 0.474 0.461        | 0.527 0.513 | 0.710 0.627 | 0.897 0.752 |
| ETTh2       | 96      | <b>0.293 0.347</b> | 0.325 0.374        | 0.443 0.465 | 0.335 0.392 | 0.331 0.390        | 0.463 0.521 | 0.465 0.482 | 0.506 0.477 |
|             | 192     | <b>0.355 0.386</b> | 0.400 0.424        | 0.533 0.516 | 0.444 0.441 | 0.451 0.452        | 0.525 0.561 | 0.671 0.599 | 0.567 0.547 |
|             | 336     | <b>0.370 0.401</b> | 0.405 0.433        | 0.445 0.472 | 0.455 0.494 | 0.460 0.478        | 0.850 0.883 | 0.848 0.776 | 0.694 0.628 |
|             | 720     | <b>0.395 0.427</b> | 0.451 0.475        | 0.507 0.498 | 0.481 0.504 | 0.552 0.509        | 0.930 0.932 | 0.871 0.811 | 0.728 0.838 |
|             | Avg     | <b>0.353 0.390</b> | 0.395 0.427        | 0.482 0.488 | 0.429 0.458 | 0.449 0.457        | 0.692 0.724 | 0.714 0.667 | 0.624 0.623 |
| ETTml       | 96      | <b>0.288 0.348</b> | 0.295 <b>0.346</b> | 0.647 0.497 | 0.454 0.456 | 0.316 0.355        | 0.419 0.401 | 0.376 0.420 | 0.563 0.551 |
|             | 192     | <b>0.327 0.373</b> | 0.333 0.374        | 0.597 0.508 | 0.471 0.490 | 0.349 <b>0.366</b> | 0.471 0.438 | 0.420 0.451 | 0.599 0.558 |
|             | 336     | <b>0.363 0.395</b> | 0.370 0.398        | 0.699 0.525 | 0.457 0.451 | 0.429 0.407        | 0.540 0.509 | 0.482 0.494 | 0.685 0.594 |
|             | 720     | <b>0.412 0.424</b> | 0.427 0.431        | 0.786 0.596 | 0.594 0.488 | 0.496 0.464        | 0.552 0.548 | 0.628 0.578 | 0.831 0.698 |
|             | Avg     | <b>0.348 0.385</b> | 0.356 0.387        | 0.682 0.532 | 0.494 0.471 | 0.398 0.398        | 0.496 0.474 | 0.477 0.486 | 0.670 0.600 |
| ETTm2       | 96      | 0.172 0.261        | 0.175 0.268        | 0.304 0.357 | 0.363 0.301 | <b>0.163 0.255</b> | 0.401 0.477 | 0.276 0.384 | 0.448 0.482 |
|             | 192     | <b>0.223 0.300</b> | 0.240 0.312        | 0.334 0.387 | 0.342 0.364 | 0.239 0.303        | 0.422 0.490 | 0.500 0.532 | 0.545 0.536 |
|             | 336     | 0.282 <b>0.331</b> | 0.298 0.351        | 0.420 0.441 | 0.414 0.361 | <b>0.259 0.366</b> | 0.513 0.508 | 0.680 0.695 | 0.681 0.744 |
|             | 720     | <b>0.374 0.388</b> | 0.403 0.413        | 0.508 0.481 | 0.580 0.456 | 0.397 <b>0.382</b> | 0.523 0.772 | 0.925 0.914 | 0.691 0.837 |
|             | Avg     | <b>0.263 0.320</b> | 0.279 0.336        | 0.392 0.417 | 0.425 0.371 | 0.265 0.327        | 0.465 0.562 | 0.595 0.631 | 0.591 0.650 |
| Weather     | 96      | 0.158 <b>0.211</b> | 0.166 0.216        | 0.216 0.280 | 0.292 0.370 | <b>0.153 0.211</b> | 0.215 0.296 | 0.327 0.359 | 0.433 0.462 |
|             | 192     | <b>0.199 0.249</b> | 0.208 0.254        | 0.303 0.335 | 0.410 0.473 | 0.207 0.250        | 0.267 0.345 | 0.390 0.422 | 0.508 0.518 |
|             | 336     | <b>0.246 0.286</b> | 0.257 0.290        | 0.351 0.358 | 0.434 0.427 | 0.249 <b>0.264</b> | 0.299 0.360 | 0.477 0.446 | 0.545 0.549 |
|             | 720     | <b>0.317 0.337</b> | 0.326 0.338        | 0.425 0.399 | 0.539 0.523 | 0.319 <b>0.320</b> | 0.361 0.395 | 0.551 0.586 | 0.576 0.572 |
|             | Avg     | <b>0.230 0.271</b> | 0.239 0.275        | 0.324 0.343 | 0.419 0.448 | 0.232 <b>0.261</b> | 0.286 0.349 | 0.436 0.453 | 0.516 0.525 |
| Electricity | 96      | <b>0.133 0.223</b> | 0.190 0.279        | 0.399 0.412 | 0.292 0.370 | 0.166 0.254        | 0.366 0.436 | 0.230 0.353 | 0.322 0.401 |
|             | 192     | <b>0.147 0.237</b> | 0.195 0.285        | 0.400 0.460 | 0.270 0.373 | 0.178 0.278        | 0.366 0.433 | 0.253 0.371 | 0.343 0.416 |
|             | 336     | <b>0.166 0.265</b> | 0.211 0.301        | 0.564 0.573 | 0.334 0.323 | 0.186 0.275        | 0.358 0.428 | 0.197 0.287 | 0.362 0.435 |
|             | 720     | <b>0.203 0.297</b> | 0.253 0.333        | 0.880 0.770 | 0.344 0.346 | 0.213 <b>0.288</b> | 0.363 0.431 | 0.230 0.328 | 0.388 0.456 |
|             | Avg     | <b>0.162 0.256</b> | 0.212 0.300        | 0.561 0.554 | 0.310 0.353 | 0.186 0.274        | 0.363 0.432 | 0.228 0.335 | 0.354 0.427 |
| Traffic     | 96      | <b>0.368 0.262</b> | 0.471 0.309        | 0.431 0.482 | 0.559 0.454 | 0.706 0.385        | 0.613 0.340 | 0.751 0.431 | 0.321 0.367 |
|             | 192     | <b>0.373 0.251</b> | 0.475 0.308        | 0.491 0.346 | 0.583 0.493 | 0.709 0.388        | 0.619 0.516 | 0.751 0.424 | 0.476 0.367 |
|             | 336     | <b>0.395 0.254</b> | 0.490 0.315        | 0.502 0.384 | 0.637 0.469 | 0.714 0.394        | 0.785 0.497 | 0.761 0.425 | 0.499 0.376 |
|             | 720     | <b>0.432 0.290</b> | 0.524 0.332        | 0.533 0.543 | 0.663 0.594 | 0.723 0.421        | 0.850 0.472 | 0.780 0.433 | 0.563 0.390 |
|             | Avg     | <b>0.392 0.264</b> | 0.490 0.316        | 0.489 0.399 | 0.611 0.503 | 0.713 0.397        | 0.717 0.456 | 0.761 0.428 | 0.501 0.375 |



Table 10: Complete results of long-term forecasting tasks for the in-domain setting of forecasting the future  $O \in \{96, 192, 336, 720\}$  time points based on the past 336 time points. **All the results of baseline are based on the unified channel-independent Transformer encoder.** The standard deviations of SimMTM are within 0.005 for MSE and within 0.004 for MAE.

| Models      | SimMTM | Random init. | Ti-MAE [8]   |       | TST [24] |              | LaST [17]    |       | TF-C [25] |     | CoST [20] |     | TS2Vec [23] |              |              |       |              |
|-------------|--------|--------------|--------------|-------|----------|--------------|--------------|-------|-----------|-----|-----------|-----|-------------|--------------|--------------|-------|--------------|
| Metric      | MSE    | MAE          | MSE          | MAE   | MSE      | MAE          | MSE          | MAE   | MSE       | MAE | MSE       | MAE | MSE         | MAE          |              |       |              |
| ETTh1       | 96     | 0.379        | <b>0.407</b> | 0.380 | 0.412    | <b>0.356</b> | 0.420        | 0.401 | 0.425     | -   | -         | -   | -           | 0.422        | 0.436        | 0.392 | 0.420        |
|             | 192    | <b>0.412</b> | <b>0.424</b> | 0.416 | 0.434    | 0.421        | 0.434        | 0.427 | 0.432     | -   | -         | -   | -           | 0.520        | 0.487        | 0.445 | 0.452        |
|             | 336    | <b>0.421</b> | <b>0.431</b> | 0.448 | 0.458    | 0.447        | 0.446        | 0.519 | 0.487     | -   | -         | -   | -           | 0.472        | 0.462        | 0.453 | 0.455        |
|             | 720    | <b>0.424</b> | <b>0.449</b> | 0.481 | 0.487    | 0.469        | 0.482        | 0.515 | 0.504     | -   | -         | -   | -           | 0.525        | 0.501        | 0.495 | 0.496        |
|             | Avg    | <b>0.409</b> | <b>0.428</b> | 0.431 | 0.448    | 0.423        | 0.446        | 0.466 | 0.462     | -   | -         | -   | -           | 0.485        | 0.472        | 0.446 | 0.456        |
| ETTh2       | 96     | <b>0.293</b> | <b>0.347</b> | 0.325 | 0.374    | 0.339        | 0.378        | 0.322 | 0.358     | -   | -         | -   | -           | 0.321        | 0.374        | 0.365 | 0.509        |
|             | 192    | <b>0.355</b> | <b>0.386</b> | 0.400 | 0.424    | 0.380        | 0.402        | 0.448 | 0.435     | -   | -         | -   | -           | 0.380        | 0.403        | 0.396 | 0.422        |
|             | 336    | <b>0.370</b> | <b>0.401</b> | 0.405 | 0.433    | 0.388        | 0.323        | 0.420 | 0.440     | -   | -         | -   | -           | 0.430        | 0.451        | 0.399 | 0.436        |
|             | 720    | <b>0.395</b> | <b>0.427</b> | 0.451 | 0.475    | 0.414        | 0.442        | 0.424 | 0.452     | -   | -         | -   | -           | 0.466        | 0.480        | 0.508 | 0.503        |
|             | Avg    | <b>0.353</b> | <b>0.390</b> | 0.395 | 0.427    | 0.380        | 0.386        | 0.404 | 0.421     | -   | -         | -   | -           | 0.399        | 0.427        | 0.417 | 0.468        |
| ETTm1       | 96     | <b>0.288</b> | 0.348        | 0.295 | 0.346    | 0.305        | 0.351        | 0.310 | 0.348     | -   | -         | -   | -           | 0.291        | <b>0.343</b> | 0.681 | 0.689        |
|             | 192    | <b>0.327</b> | 0.373        | 0.333 | 0.374    | 0.343        | 0.374        | 0.362 | 0.380     | -   | -         | -   | -           | 0.330        | <b>0.370</b> | 0.689 | 0.551        |
|             | 336    | <b>0.363</b> | <b>0.395</b> | 0.370 | 0.398    | 0.387        | 0.407        | 0.389 | 0.402     | -   | -         | -   | -           | 0.382        | 0.401        | 0.704 | 0.559        |
|             | 720    | <b>0.412</b> | <b>0.424</b> | 0.427 | 0.431    | 0.428        | 0.432        | 0.433 | 0.427     | -   | -         | -   | -           | 0.422        | 0.425        | 0.721 | 0.571        |
|             | Avg    | <b>0.348</b> | <b>0.385</b> | 0.356 | 0.387    | 0.366        | 0.391        | 0.373 | 0.389     | -   | -         | -   | -           | 0.356        | 0.385        | 0.699 | 0.557        |
| ETTm2       | 96     | <b>0.172</b> | 0.261        | 0.175 | 0.268    | 0.174        | <b>0.258</b> | 0.215 | 0.296     | -   | -         | -   | -           | 0.242        | 0.333        | 0.224 | 0.303        |
|             | 192    | <b>0.223</b> | <b>0.300</b> | 0.240 | 0.312    | 0.257        | 0.303        | 0.259 | 0.323     | -   | -         | -   | -           | 0.283        | 0.345        | 0.273 | 0.331        |
|             | 336    | 0.282        | <b>0.331</b> | 0.298 | 0.351    | <b>0.277</b> | 0.333        | 0.319 | 0.364     | -   | -         | -   | -           | 0.303        | 0.349        | 0.399 | 0.402        |
|             | 720    | 0.374        | <b>0.388</b> | 0.403 | 0.413    | <b>0.360</b> | 0.404        | 0.395 | 0.405     | -   | -         | -   | -           | 0.431        | 0.431        | 0.406 | 0.408        |
|             | Avg    | <b>0.263</b> | <b>0.320</b> | 0.279 | 0.336    | 0.267        | 0.325        | 0.297 | 0.347     | -   | -         | -   | -           | 0.314        | 0.365        | 0.326 | 0.361        |
| Weather     | 96     | 0.158        | 0.211        | 0.166 | 0.216    | <b>0.153</b> | <b>0.196</b> | 0.162 | 0.214     | -   | -         | -   | -           | 0.216        | 0.280        | 0.154 | 0.205        |
|             | 192    | <b>0.199</b> | 0.249        | 0.208 | 0.254    | 0.214        | 0.253        | 0.203 | 0.252     | -   | -         | -   | -           | 0.303        | 0.335        | 0.200 | <b>0.243</b> |
|             | 336    | 0.246        | 0.286        | 0.257 | 0.290    | <b>0.243</b> | <b>0.272</b> | 0.260 | 0.297     | -   | -         | -   | -           | 0.351        | 0.358        | 0.252 | 0.286        |
|             | 720    | <b>0.317</b> | 0.337        | 0.326 | 0.338    | 0.324        | 0.349        | 0.330 | 0.342     | -   | -         | -   | -           | 0.425        | 0.343        | 0.324 | <b>0.335</b> |
|             | Avg    | <b>0.230</b> | 0.271        | 0.239 | 0.275    | 0.234        | <b>0.265</b> | 0.239 | 0.276     | -   | -         | -   | -           | 0.324        | 0.329        | 0.233 | 0.267        |
| Electricity | 96     | <b>0.133</b> | <b>0.223</b> | 0.190 | 0.279    | 0.163        | 0.255        | 0.186 | 0.268     | -   | -         | -   | -           | 0.197        | 0.277        | 0.195 | 0.275        |
|             | 192    | <b>0.147</b> | <b>0.237</b> | 0.195 | 0.285    | 0.194        | 0.288        | 0.193 | 0.276     | -   | -         | -   | -           | 0.197        | 0.279        | 0.195 | 0.277        |
|             | 336    | <b>0.166</b> | <b>0.265</b> | 0.211 | 0.301    | 0.201        | 0.298        | 0.206 | 0.289     | -   | -         | -   | -           | 0.211        | 0.295        | 0.210 | 0.294        |
|             | 720    | <b>0.203</b> | <b>0.297</b> | 0.253 | 0.333    | 0.263        | 0.343        | 0.250 | 0.324     | -   | -         | -   | -           | 0.255        | 0.330        | 0.252 | 0.327        |
|             | Avg    | <b>0.162</b> | <b>0.256</b> | 0.212 | 0.300    | 0.205        | 0.296        | 0.209 | 0.289     | -   | -         | -   | -           | 0.215        | 0.295        | 0.213 | 0.293        |
| Traffic     | 96     | <b>0.368</b> | <b>0.262</b> | 0.471 | 0.309    | 0.448        | 0.298        | 0.595 | 0.360     | -   | -         | -   | -           | 0.378        | 0.365        | 0.480 | 0.357        |
|             | 192    | 0.373        | <b>0.251</b> | 0.475 | 0.308    | 0.445        | 0.301        | 0.576 | 0.353     | -   | -         | -   | -           | <b>0.371</b> | 0.352        | 0.439 | 0.336        |
|             | 336    | <b>0.395</b> | <b>0.254</b> | 0.490 | 0.315    | 0.492        | 0.320        | 0.569 | 0.362     | -   | -         | -   | -           | 0.467        | 0.354        | 0.460 | 0.344        |
|             | 720    | <b>0.432</b> | <b>0.290</b> | 0.524 | 0.332    | 0.514        | 0.321        | 0.603 | 0.372     | -   | -         | -   | -           | 0.525        | 0.378        | 0.499 | 0.364        |
|             | Avg    | <b>0.392</b> | <b>0.264</b> | 0.490 | 0.316    | 0.475        | 0.310        | 0.586 | 0.362     | -   | -         | -   | -           | 0.435        | 0.362        | 0.470 | 0.350        |

Table 11: Complete results of long-term forecasting tasks for the cross-domain setting of forecasting the future  $O \in \{96, 192, 336, 720\}$  time points based on the past 336 time points. **All the results of baselines are based on the encoder utilized in their original papers.** The standard deviations of SimMTM are within 0.005 for MSE and within 0.004 for MAE.

| Models                | SimMTM |              | Random init. |              | Ti-MAE [8]   |       | TST [24] |       | LaST [17] |              | TF-C [25]    |       | CoST [20] |              | TS2Vec [23]  |       |       |
|-----------------------|--------|--------------|--------------|--------------|--------------|-------|----------|-------|-----------|--------------|--------------|-------|-----------|--------------|--------------|-------|-------|
| Metric                | MSE    | MAE          | MSE          | MAE          | MSE          | MAE   | MSE      | MAE   | MSE       | MAE          | MSE          | MAE   | MSE       | MAE          | MSE          | MAE   |       |
| ETTh2<br>↓<br>ETTh1   | 96     | 0.372        | <b>0.401</b> | 0.380        | 0.412        | 0.703 | 0.562    | 0.653 | 0.468     | <b>0.362</b> | 0.420        | 0.596 | 0.569     | 0.378        | 0.421        | 0.849 | 0.694 |
|                       | 192    | <b>0.414</b> | <b>0.425</b> | 0.416        | 0.434        | 0.715 | 0.567    | 0.658 | 0.502     | 0.426        | 0.478        | 0.614 | 0.621     | 0.424        | 0.451        | 0.909 | 0.738 |
|                       | 336    | <b>0.429</b> | <b>0.436</b> | 0.448        | 0.458        | 0.733 | 0.579    | 0.631 | 0.561     | 0.522        | 0.509        | 0.694 | 0.664     | 0.651        | 0.582        | 1.082 | 0.775 |
|                       | 720    | <b>0.446</b> | <b>0.458</b> | 0.481        | 0.487        | 0.762 | 0.622    | 0.638 | 0.608     | 0.460        | 0.478        | 0.635 | 0.683     | 0.883        | 0.701        | 0.934 | 0.769 |
|                       | Avg    | <b>0.415</b> | <b>0.430</b> | 0.431        | 0.448        | 0.728 | 0.583    | 0.645 | 0.535     | 0.443        | 0.471        | 0.635 | 0.634     | 0.584        | 0.539        | 0.944 | 0.744 |
| ETTh1<br>↓<br>ETTh1   | 96     | 0.367        | 0.398        | 0.380        | 0.412        | 0.715 | 0.581    | 0.627 | 0.477     | <b>0.360</b> | <b>0.374</b> | 0.666 | 0.647     | 0.423        | 0.450        | 0.991 | 0.765 |
|                       | 192    | 0.396        | 0.421        | 0.416        | 0.434        | 0.729 | 0.587    | 0.628 | 0.500     | <b>0.381</b> | <b>0.371</b> | 0.672 | 0.653     | 0.641        | 0.578        | 0.829 | 0.699 |
|                       | 336    | 0.471        | <b>0.437</b> | <b>0.448</b> | 0.458        | 0.712 | 0.583    | 0.683 | 0.554     | 0.472        | 0.531        | 0.626 | 0.711     | 0.863        | 0.694        | 0.971 | 0.787 |
|                       | 720    | <b>0.454</b> | <b>0.463</b> | 0.481        | 0.487        | 0.747 | 0.627    | 0.642 | 0.600     | 0.490        | 0.488        | 0.835 | 0.797     | 1.071        | 0.805        | 1.037 | 0.820 |
|                       | Avg    | <b>0.422</b> | <b>0.430</b> | 0.431        | 0.448        | 0.726 | 0.595    | 0.645 | 0.533     | 0.426        | 0.441        | 0.700 | 0.702     | 0.750        | 0.632        | 0.957 | 0.768 |
| ETTh2<br>↓<br>ETTh1   | 96     | 0.388        | 0.421        | 0.380        | <b>0.412</b> | 0.699 | 0.566    | 0.559 | 0.489     | 0.428        | 0.454        | 0.968 | 0.738     | <b>0.377</b> | 0.419        | 0.783 | 0.669 |
|                       | 192    | 0.419        | <b>0.423</b> | <b>0.416</b> | 0.434        | 0.722 | 0.573    | 0.600 | 0.579     | 0.427        | 0.497        | 1.080 | 0.801     | 0.422        | 0.450        | 0.828 | 0.691 |
|                       | 336    | <b>0.435</b> | <b>0.444</b> | 0.448        | 0.458        | 0.714 | 0.569    | 0.677 | 0.572     | 0.528        | 0.540        | 1.091 | 0.824     | 0.648        | 0.580        | 0.990 | 0.762 |
|                       | 720    | <b>0.468</b> | <b>0.474</b> | 0.481        | 0.487        | 0.760 | 0.611    | 0.694 | 0.664     | 0.527        | 0.537        | 1.226 | 0.893     | 0.880        | 0.699        | 0.985 | 0.783 |
|                       | Avg    | <b>0.428</b> | <b>0.441</b> | 0.431        | 0.448        | 0.724 | 0.580    | 0.632 | 0.576     | 0.503        | 0.507        | 1.091 | 0.814     | 0.582        | 0.537        | 0.896 | 0.726 |
| Weather<br>↓<br>ETTh1 | 96     | 0.477        | 0.444        | <b>0.380</b> | <b>0.412</b> | -     | -        | -     | -         | -            | -            | -     | -         | -            | -            | -     | -     |
|                       | 192    | 0.454        | 0.522        | <b>0.416</b> | <b>0.434</b> | -     | -        | -     | -         | -            | -            | -     | -         | -            | -            | -     | -     |
|                       | 336    | <b>0.424</b> | <b>0.434</b> | 0.448        | 0.458        | -     | -        | -     | -         | -            | -            | -     | -         | -            | -            | -     | -     |
|                       | 720    | <b>0.468</b> | <b>0.469</b> | 0.481        | 0.487        | -     | -        | -     | -         | -            | -            | -     | -         | -            | -            | -     | -     |
|                       | Avg    | 0.456        | 0.467        | <b>0.431</b> | <b>0.448</b> | -     | -        | -     | -         | -            | -            | -     | -         | -            | -            | -     | -     |
| ETTh1<br>↓<br>ETTh1   | 96     | 0.290        | 0.348        | 0.295        | 0.346        | 0.667 | 0.521    | 0.425 | 0.381     | 0.295        | 0.387        | 0.672 | 0.600     | <b>0.248</b> | <b>0.332</b> | 0.605 | 0.561 |
|                       | 192    | <b>0.327</b> | <b>0.372</b> | 0.333        | 0.374        | 0.561 | 0.479    | 0.495 | 0.478     | 0.335        | 0.379        | 0.721 | 0.639     | 0.336        | 0.391        | 0.615 | 0.561 |
|                       | 336    | <b>0.357</b> | 0.392        | 0.370        | 0.398        | 0.690 | 0.533    | 0.456 | 0.441     | 0.379        | <b>0.363</b> | 0.755 | 0.664     | 0.381        | 0.421        | 0.763 | 0.677 |
|                       | 720    | 0.409        | <b>0.423</b> | 0.427        | 0.431        | 0.744 | 0.583    | 0.554 | 0.477     | <b>0.403</b> | 0.431        | 0.837 | 0.705     | 0.469        | 0.482        | 0.805 | 0.664 |
|                       | Avg    | <b>0.346</b> | <b>0.384</b> | 0.356        | 0.387        | 0.666 | 0.529    | 0.482 | 0.444     | 0.353        | 0.390        | 0.746 | 0.652     | 0.359        | 0.407        | 0.697 | 0.616 |
| ETTh2<br>↓<br>ETTh1   | 96     | 0.322        | 0.347        | 0.295        | 0.346        | 0.658 | 0.505    | 0.449 | 0.343     | 0.314        | 0.396        | 0.677 | 0.603     | <b>0.253</b> | <b>0.342</b> | 0.466 | 0.480 |
|                       | 192    | <b>0.332</b> | <b>0.372</b> | 0.333        | 0.374        | 0.594 | 0.511    | 0.477 | 0.407     | 0.587        | 0.545        | 0.718 | 0.638     | 0.367        | 0.392        | 0.557 | 0.532 |
|                       | 336    | 0.394        | 0.391        | <b>0.370</b> | <b>0.398</b> | 0.732 | 0.532    | 0.407 | 0.519     | 0.631        | 0.584        | 0.755 | 0.663     | 0.388        | 0.431        | 0.646 | 0.576 |
|                       | 720    | <b>0.411</b> | <b>0.424</b> | 0.427        | 0.431        | 0.768 | 0.592    | 0.557 | 0.523     | 0.368        | 0.429        | 0.848 | 0.712     | 0.498        | 0.488        | 0.752 | 0.638 |
|                       | Avg    | 0.365        | 0.384        | <b>0.356</b> | <b>0.387</b> | 0.688 | 0.535    | 0.472 | 0.448     | 0.475        | 0.489        | 0.750 | 0.654     | 0.377        | 0.413        | 0.606 | 0.556 |
| ETTh2<br>↓<br>ETTh1   | 96     | 0.297        | 0.348        | 0.295        | 0.346        | 0.647 | 0.497    | 0.471 | 0.422     | 0.304        | 0.388        | 0.610 | 0.577     | <b>0.239</b> | <b>0.331</b> | 0.586 | 0.515 |
|                       | 192    | <b>0.332</b> | <b>0.370</b> | 0.333        | 0.374        | 0.597 | 0.508    | 0.495 | 0.442     | 0.429        | 0.494        | 0.725 | 0.657     | 0.339        | 0.371        | 0.624 | 0.562 |
|                       | 336    | <b>0.364</b> | <b>0.393</b> | 0.370        | 0.398        | 0.700 | 0.525    | 0.455 | 0.424     | 0.499        | 0.523        | 0.768 | 0.684     | 0.371        | 0.421        | 1.035 | 0.806 |
|                       | 720    | <b>0.410</b> | <b>0.421</b> | 0.427        | 0.431        | 0.786 | 0.596    | 0.498 | 0.532     | 0.422        | 0.450        | 0.927 | 0.759     | 0.467        | 0.481        | 0.780 | 0.669 |
|                       | Avg    | <b>0.351</b> | <b>0.383</b> | 0.356        | 0.387        | 0.682 | 0.531    | 0.480 | 0.455     | 0.414        | 0.464        | 0.758 | 0.669     | 0.354        | 0.401        | 0.756 | 0.638 |
| Weather<br>↓<br>ETTh1 | 96     | 0.304        | 0.354        | <b>0.295</b> | <b>0.346</b> | -     | -        | -     | -         | -            | -            | -     | -         | -            | -            | -     | -     |
|                       | 192    | 0.338        | 0.375        | <b>0.333</b> | <b>0.374</b> | -     | -        | -     | -         | -            | -            | -     | -         | -            | -            | -     | -     |
|                       | 336    | 0.371        | <b>0.397</b> | <b>0.370</b> | 0.398        | -     | -        | -     | -         | -            | -            | -     | -         | -            | -            | -     | -     |
|                       | 720    | <b>0.417</b> | <b>0.426</b> | 0.427        | 0.431        | -     | -        | -     | -         | -            | -            | -     | -         | -            | -            | -     | -     |
|                       | Avg    | 0.358        | 0.388        | <b>0.356</b> | <b>0.387</b> | -     | -        | -     | -         | -            | -            | -     | -         | -            | -            | -     | -     |

Table 12: Complete results of long-term forecasting tasks for the in-domain setting. **All the results of baseline are based on the unified channel-independent Transformer encoder.** The past sequence length is set as 336. The unified channel-independent transformer model can perform the transfer experiment between datasets with different variables. The standard deviations of SimMTM are within 0.005 for MSE and within 0.004 for MAE.

| Models                |     | SimMTM       |              | Random init. |              | Ti-MAE [8] |              | TST [24]     |       | LaST [17] |     | TF-C [25] |     | CoST [20]    |              | TS2Vec [23]  |              |
|-----------------------|-----|--------------|--------------|--------------|--------------|------------|--------------|--------------|-------|-----------|-----|-----------|-----|--------------|--------------|--------------|--------------|
| Metric                |     | MSE          | MAE          | MSE          | MAE          | MSE        | MAE          | MSE          | MAE   | MSE       | MAE | MSE       | MAE | MSE          | MAE          | MSE          | MAE          |
| ETTh2<br>↓<br>ETTh1   | 96  | <b>0.372</b> | 0.401        | 0.380        | 0.412        | 0.399      | 0.424        | 0.401        | 0.425 | -         | -   | -         | -   | 0.376        | <b>0.362</b> | 0.436        | 0.430        |
|                       | 192 | 0.414        | 0.425        | 0.416        | 0.434        | 0.454      | 0.440        | 0.531        | 0.484 | -         | -   | -         | -   | <b>0.376</b> | <b>0.362</b> | 0.455        | 0.440        |
|                       | 336 | <b>0.429</b> | <b>0.436</b> | 0.448        | 0.458        | 0.497      | 0.469        | 0.474        | 0.459 | -         | -   | -         | -   | 0.444        | 0.444        | 0.689        | 0.584        |
|                       | 720 | <b>0.446</b> | 0.458        | 0.481        | 0.487        | 0.515      | 0.492        | 0.471        | 0.469 | -         | -   | -         | -   | 0.517        | 0.510        | 0.489        | 0.490        |
|                       | Avg | <b>0.415</b> | <b>0.430</b> | 0.431        | 0.448        | 0.466      | 0.456        | 0.469        | 0.459 | -         | -   | -         | -   | 0.428        | 0.433        | 0.517        | 0.486        |
| ETTh1<br>↓<br>ETTh1   | 96  | <b>0.367</b> | <b>0.398</b> | 0.380        | 0.412        | 0.400      | 0.418        | 0.443        | 0.440 | -         | -   | -         | -   | 0.465        | 0.456        | 0.413        | 0.443        |
|                       | 192 | <b>0.396</b> | <b>0.421</b> | 0.416        | 0.434        | 0.434      | 0.445        | 0.471        | 0.455 | -         | -   | -         | -   | 0.722        | 0.588        | 0.459        | 0.465        |
|                       | 336 | 0.471        | <b>0.437</b> | <b>0.448</b> | 0.458        | 0.510      | 0.467        | 0.462        | 0.455 | -         | -   | -         | -   | 0.712        | 0.586        | 0.614        | 0.554        |
|                       | 720 | 0.454        | <b>0.463</b> | 0.481        | 0.487        | 0.636      | 0.544        | 0.525        | 0.503 | -         | -   | -         | -   | 0.581        | 0.533        | <b>0.450</b> | 0.464        |
|                       | Avg | <b>0.422</b> | <b>0.430</b> | 0.431        | 0.448        | 0.495      | 0.469        | 0.475        | 0.463 | -         | -   | -         | -   | 0.620        | 0.541        | 0.484        | 0.482        |
| ETTh2<br>↓<br>ETTh1   | 96  | 0.388        | 0.421        | <b>0.380</b> | <b>0.412</b> | 0.433      | 0.431        | 0.389        | 0.413 | -         | -   | -         | -   | 0.403        | 0.426        | 0.483        | 0.480        |
|                       | 192 | 0.419        | <b>0.423</b> | <b>0.416</b> | 0.434        | 0.474      | 0.458        | 0.463        | 0.452 | -         | -   | -         | -   | 0.457        | 0.468        | 0.579        | 0.537        |
|                       | 336 | <b>0.435</b> | 0.444        | 0.448        | 0.458        | 0.515      | 0.448        | 0.492        | 0.465 | -         | -   | -         | -   | 0.794        | 0.682        | 0.673        | 0.563        |
|                       | 720 | <b>0.468</b> | <b>0.474</b> | 0.481        | 0.487        | 0.496      | 0.488        | 0.468        | 0.468 | -         | -   | -         | -   | 0.739        | 0.617        | 0.729        | 0.620        |
|                       | Avg | <b>0.428</b> | <b>0.441</b> | 0.431        | 0.448        | 0.464      | 0.456        | 0.453        | 0.450 | -         | -   | -         | -   | 0.598        | 0.548        | 0.616        | 0.550        |
| Weather<br>↓<br>ETTh1 | 96  | 0.477        | 0.444        | <b>0.380</b> | 0.412        | 0.397      | 0.440        | 0.428        | 0.429 | -         | -   | -         | -   | 0.421        | 0.410        | 0.393        | <b>0.410</b> |
|                       | 192 | 0.454        | 0.522        | <b>0.416</b> | <b>0.434</b> | 0.458      | 0.466        | 0.461        | 0.451 | -         | -   | -         | -   | 0.539        | 0.503        | 0.440        | 0.437        |
|                       | 336 | <b>0.424</b> | <b>0.434</b> | 0.448        | 0.458        | 0.479      | 0.458        | 0.463        | 0.456 | -         | -   | -         | -   | 0.568        | 0.514        | 0.450        | 0.451        |
|                       | 720 | <b>0.468</b> | <b>0.469</b> | 0.481        | 0.487        | 0.515      | 0.492        | 0.507        | 0.489 | -         | -   | -         | -   | 0.544        | 0.522        | 0.567        | 0.541        |
|                       | Avg | 0.456        | 0.467        | <b>0.431</b> | <b>0.448</b> | 0.462      | 0.464        | 0.465        | 0.456 | -         | -   | -         | -   | 0.518        | 0.487        | 0.463        | 0.460        |
| ETTh1<br>↓<br>ETTh1   | 96  | <b>0.290</b> | 0.348        | 0.295        | <b>0.346</b> | 0.311      | 0.355        | 0.315        | 0.354 | -         | -   | -         | -   | 0.308        | 0.355        | 0.681        | 0.545        |
|                       | 192 | 0.327        | <b>0.372</b> | 0.333        | 0.374        | 0.337      | <b>0.372</b> | 0.365        | 0.391 | -         | -   | -         | -   | 0.357        | 0.390        | 0.689        | 0.551        |
|                       | 336 | <b>0.357</b> | <b>0.392</b> | 0.370        | 0.398        | 0.372      | 0.398        | 0.384        | 0.400 | -         | -   | -         | -   | 0.396        | 0.402        | 0.705        | 0.560        |
|                       | 720 | <b>0.409</b> | <b>0.423</b> | 0.427        | 0.431        | 0.422      | 0.433        | 0.428        | 0.426 | -         | -   | -         | -   | 0.419        | 0.423        | 0.722        | 0.571        |
|                       | Avg | <b>0.346</b> | <b>0.384</b> | 0.356        | 0.387        | 0.360      | 0.390        | 0.373        | 0.393 | -         | -   | -         | -   | 0.370        | 0.393        | 0.699        | 0.557        |
| ETTh2<br>↓<br>ETTh1   | 96  | 0.322        | 0.347        | <b>0.295</b> | <b>0.346</b> | 0.323      | 0.362        | 0.338        | 0.383 | -         | -   | -         | -   | 0.322        | 0.351        | 0.679        | 0.546        |
|                       | 192 | 0.332        | <b>0.372</b> | 0.333        | 0.374        | 0.370      | 0.395        | 0.394        | 0.408 | -         | -   | -         | -   | <b>0.331</b> | 0.373        | 0.673        | 0.551        |
|                       | 336 | 0.394        | <b>0.391</b> | <b>0.370</b> | 0.398        | 0.397      | 0.413        | 0.401        | 0.412 | -         | -   | -         | -   | 0.382        | 0.397        | 0.703        | 0.557        |
|                       | 720 | <b>0.411</b> | <b>0.424</b> | 0.427        | 0.431        | 0.442      | 0.439        | 0.434        | 0.432 | -         | -   | -         | -   | 0.417        | 0.428        | 0.722        | 0.573        |
|                       | Avg | 0.365        | <b>0.384</b> | <b>0.356</b> | 0.387        | 0.383      | 0.402        | 0.391        | 0.409 | -         | -   | -         | -   | 0.363        | 0.387        | 0.694        | 0.557        |
| ETTh2<br>↓<br>ETTh1   | 96  | 0.297        | 0.348        | <b>0.295</b> | <b>0.346</b> | 0.333      | 0.378        | 0.327        | 0.364 | -         | -   | -         | -   | 0.320        | 0.364        | 0.422        | 0.434        |
|                       | 192 | <b>0.332</b> | <b>0.370</b> | 0.333        | 0.374        | 0.381      | 0.398        | 0.362        | 0.389 | -         | -   | -         | -   | 0.367        | 0.386        | 0.387        | 0.371        |
|                       | 336 | <b>0.364</b> | <b>0.393</b> | 0.370        | 0.398        | 0.394      | 0.413        | 0.401        | 0.418 | -         | -   | -         | -   | 0.374        | 0.394        | 0.402        | 0.444        |
|                       | 720 | <b>0.410</b> | <b>0.421</b> | 0.427        | 0.431        | 0.455      | 0.453        | 0.437        | 0.437 | -         | -   | -         | -   | 0.479        | 0.503        | 0.481        | 0.432        |
|                       | Avg | <b>0.351</b> | <b>0.383</b> | 0.356        | 0.387        | 0.390      | 0.410        | 0.382        | 0.402 | -         | -   | -         | -   | 0.385        | 0.412        | 0.423        | 0.420        |
| Weather<br>↓<br>ETTh1 | 96  | <b>0.294</b> | 0.354        | 0.295        | <b>0.346</b> | 0.338      | 0.380        | 0.324        | 0.366 | -         | -   | -         | -   | 0.324        | 0.360        | 0.329        | 0.359        |
|                       | 192 | <b>0.318</b> | <b>0.355</b> | 0.333        | 0.374        | 0.473      | 0.457        | 0.349        | 0.377 | -         | -   | -         | -   | 0.359        | 0.387        | 0.392        | 0.392        |
|                       | 336 | <b>0.361</b> | <b>0.397</b> | 0.370        | 0.398        | 0.402      | 0.415        | 0.378        | 0.398 | -         | -   | -         | -   | 0.395        | 0.399        | 0.372        | 0.400        |
|                       | 720 | 0.427        | <b>0.426</b> | 0.427        | 0.431        | 0.432      | 0.438        | <b>0.422</b> | 0.427 | -         | -   | -         | -   | 0.450        | 0.467        | 0.434        | 0.429        |
|                       | Avg | <b>0.350</b> | <b>0.383</b> | 0.356        | 0.387        | 0.411      | 0.423        | 0.368        | 0.392 | -         | -   | -         | -   | 0.382        | 0.403        | 0.382        | 0.395        |

Table 13: Full ablation studies for the in-domain setting of forecasting. The standard deviations of SimMTM are within 0.005 for MSE and within 0.004 for MAE.

| Input-336   |     | Supervised |       | W/o $\mathcal{L}_{reconstruction}$ |              | W/o $\mathcal{L}_{constraint}$ |              | SimMTM       |              |
|-------------|-----|------------|-------|------------------------------------|--------------|--------------------------------|--------------|--------------|--------------|
| Metric      |     | MSE        | MAE   | MSE                                | MAE          | MSE                            | MAE          | MSE          | MAE          |
| ETTh1       | 96  | 0.380      | 0.412 | <b>0.377</b>                       | 0.408        | 0.381                          | 0.409        | 0.379        | <b>0.407</b> |
|             | 192 | 0.416      | 0.434 | 0.419                              | 0.443        | <b>0.409</b>                   | 0.443        | 0.412        | <b>0.424</b> |
|             | 336 | 0.448      | 0.458 | 0.423                              | 0.434        | 0.432                          | 0.444        | <b>0.421</b> | <b>0.431</b> |
|             | 720 | 0.481      | 0.487 | 0.437                              | 0.454        | 0.447                          | 0.454        | <b>0.424</b> | <b>0.449</b> |
|             | Avg | 0.431      | 0.448 | 0.414                              | 0.435        | 0.417                          | 0.438        | <b>0.409</b> | <b>0.428</b> |
| ETTh2       | 96  | 0.325      | 0.374 | <b>0.288</b>                       | <b>0.344</b> | 0.312                          | 0.365        | 0.293        | 0.347        |
|             | 192 | 0.400      | 0.424 | 0.356                              | 0.391        | 0.389                          | 0.418        | <b>0.355</b> | <b>0.386</b> |
|             | 336 | 0.405      | 0.433 | <b>0.368</b>                       | 0.406        | 0.396                          | 0.432        | 0.370        | <b>0.401</b> |
|             | 720 | 0.451      | 0.475 | 0.409                              | 0.432        | 0.448                          | 0.479        | <b>0.395</b> | <b>0.427</b> |
|             | Avg | 0.395      | 0.427 | 0.355                              | 0.393        | 0.386                          | 0.424        | <b>0.353</b> | <b>0.390</b> |
| ETTh1       | 96  | 0.295      | 0.346 | 0.291                              | 0.343        | <b>0.282</b>                   | <b>0.337</b> | 0.288        | 0.348        |
|             | 192 | 0.333      | 0.374 | 0.330                              | 0.390        | <b>0.324</b>                   | 0.388        | 0.327        | <b>0.373</b> |
|             | 336 | 0.370      | 0.398 | 0.369                              | 0.399        | 0.366                          | 0.397        | <b>0.363</b> | <b>0.395</b> |
|             | 720 | 0.427      | 0.431 | 0.417                              | 0.429        | 0.424                          | 0.435        | <b>0.412</b> | <b>0.424</b> |
|             | Avg | 0.356      | 0.387 | 0.352                              | 0.390        | 0.349                          | 0.389        | <b>0.348</b> | <b>0.385</b> |
| ETTh2       | 96  | 0.175      | 0.268 | 0.174                              | 0.265        | <b>0.170</b>                   | <b>0.261</b> | 0.172        | <b>0.261</b> |
|             | 192 | 0.240      | 0.312 | 0.232                              | 0.303        | 0.244                          | 0.320        | <b>0.223</b> | <b>0.300</b> |
|             | 336 | 0.298      | 0.351 | 0.313                              | 0.365        | <b>0.279</b>                   | 0.334        | 0.282        | <b>0.331</b> |
|             | 720 | 0.403      | 0.413 | 0.376                              | 0.451        | 0.376                          | <b>0.378</b> | <b>0.374</b> | 0.388        |
|             | Avg | 0.279      | 0.336 | 0.274                              | 0.346        | 0.267                          | 0.323        | <b>0.263</b> | <b>0.320</b> |
| Weather     | 96  | 0.166      | 0.216 | 0.164                              | <b>0.209</b> | 0.160                          | 0.212        | <b>0.158</b> | 0.211        |
|             | 192 | 0.208      | 0.254 | 0.203                              | 0.258        | 0.203                          | 0.251        | <b>0.199</b> | <b>0.249</b> |
|             | 336 | 0.257      | 0.290 | 0.244                              | 0.289        | 0.253                          | 0.290        | <b>0.246</b> | <b>0.286</b> |
|             | 720 | 0.326      | 0.338 | 0.322                              | 0.343        | 0.325                          | 0.340        | <b>0.317</b> | <b>0.337</b> |
|             | Avg | 0.239      | 0.275 | 0.233                              | 0.275        | 0.235                          | 0.273        | <b>0.230</b> | <b>0.271</b> |
| Electricity | 96  | 0.190      | 0.279 | 0.177                              | 0.270        | 0.134                          | <b>0.220</b> | <b>0.133</b> | 0.223        |
|             | 192 | 0.195      | 0.285 | 0.184                              | 0.279        | 0.163                          | 0.274        | <b>0.147</b> | <b>0.237</b> |
|             | 336 | 0.211      | 0.301 | 0.202                              | 0.300        | 0.223                          | 0.311        | <b>0.166</b> | <b>0.265</b> |
|             | 720 | 0.253      | 0.333 | 0.250                              | 0.337        | 0.241                          | 0.321        | <b>0.203</b> | <b>0.297</b> |
|             | Avg | 0.212      | 0.300 | 0.203                              | 0.397        | 0.190                          | 0.282        | <b>0.162</b> | <b>0.256</b> |
| Traffic     | 96  | 0.471      | 0.309 | <b>0.366</b>                       | <b>0.257</b> | 0.457                          | 0.301        | 0.368        | 0.262        |
|             | 192 | 0.475      | 0.308 | <b>0.373</b>                       | 0.266        | 0.468                          | 0.325        | <b>0.373</b> | <b>0.251</b> |
|             | 336 | 0.490      | 0.315 | 0.401                              | 0.249        | 0.487                          | 0.302        | <b>0.395</b> | <b>0.254</b> |
|             | 720 | 0.524      | 0.332 | 0.472                              | 0.312        | 0.485                          | 0.315        | <b>0.432</b> | <b>0.290</b> |
|             | Avg | 0.490      | 0.316 | 0.403                              | 0.271        | 0.474                          | 0.311        | <b>0.392</b> | <b>0.264</b> |

Table 14: Full ablation studies on transfer to ETTh1 and ETTm1 for the cross-domain setting of forecasting. The standard deviations of SimMTM are within 0.005 for MSE and within 0.004 for MAE.

| Input-336<br>Metric   |     | Supervised   |              | W/o $\mathcal{L}_{\text{reconstruction}}$ |              | W/o $\mathcal{L}_{\text{constraint}}$ |              | SimMTM       |              |
|-----------------------|-----|--------------|--------------|-------------------------------------------|--------------|---------------------------------------|--------------|--------------|--------------|
|                       |     | MSE          | MAE          | MSE                                       | MAE          | MSE                                   | MAE          | MSE          | MAE          |
| ETTh2<br>↓<br>ETTh1   | 96  | 0.380        | 0.412        | 0.377                                     | <b>0.400</b> | 0.402                                 | 0.411        | <b>0.372</b> | 0.401        |
|                       | 192 | 0.416        | 0.434        | 0.417                                     | 0.424        | 0.417                                 | <b>0.420</b> | <b>0.414</b> | 0.425        |
|                       | 336 | 0.448        | 0.458        | 0.437                                     | 0.439        | 0.437                                 | <b>0.435</b> | <b>0.429</b> | 0.436        |
|                       | 720 | 0.481        | 0.487        | 0.448                                     | 0.463        | 0.456                                 | 0.467        | <b>0.446</b> | <b>0.458</b> |
|                       | Avg | 0.431        | 0.448        | 0.420                                     | 0.432        | 0.423                                 | <b>0.430</b> | <b>0.415</b> | <b>0.430</b> |
| ETTh1<br>↓<br>ETTh1   | 96  | 0.380        | 0.412        | 0.382                                     | <b>0.397</b> | 0.375                                 | 0.399        | <b>0.367</b> | 0.398        |
|                       | 192 | 0.416        | 0.434        | 0.418                                     | <b>0.418</b> | 0.413                                 | 0.422        | <b>0.396</b> | 0.421        |
|                       | 336 | 0.448        | 0.458        | 0.437                                     | <b>0.434</b> | <b>0.434</b>                          | 0.438        | 0.471        | 0.437        |
|                       | 720 | 0.481        | 0.487        | 0.459                                     | 0.469        | 0.467                                 | 0.475        | <b>0.454</b> | <b>0.463</b> |
|                       | Avg | 0.431        | 0.448        | 0.424                                     | 0.430        | 0.422                                 | 0.434        | <b>0.422</b> | <b>0.430</b> |
| ETTh2<br>↓<br>ETTh1   | 96  | <b>0.380</b> | <b>0.412</b> | 0.388                                     | 0.418        | 0.384                                 | 0.415        | 0.388        | 0.421        |
|                       | 192 | <b>0.416</b> | 0.434        | 0.429                                     | 0.444        | 0.423                                 | 0.439        | 0.419        | <b>0.423</b> |
|                       | 336 | 0.448        | 0.458        | 0.467                                     | 0.472        | 0.458                                 | 0.465        | <b>0.435</b> | <b>0.444</b> |
|                       | 720 | 0.481        | 0.487        | 0.521                                     | 0.507        | 0.501                                 | 0.497        | <b>0.468</b> | <b>0.474</b> |
|                       | Avg | 0.431        | 0.448        | 0.451                                     | 0.460        | 0.441                                 | 0.454        | <b>0.428</b> | <b>0.441</b> |
| Weather<br>↓<br>ETTh1 | 96  | <b>0.380</b> | 0.412        | 0.385                                     | <b>0.400</b> | 0.394                                 | 0.406        | 0.477        | 0.444        |
|                       | 192 | <b>0.416</b> | 0.434        | 0.417                                     | 0.429        | 0.425                                 | <b>0.424</b> | 0.454        | 0.522        |
|                       | 336 | 0.448        | 0.458        | 0.434                                     | <b>0.434</b> | 0.441                                 | 0.439        | <b>0.424</b> | <b>0.434</b> |
|                       | 720 | 0.481        | 0.487        | <b>0.444</b>                              | <b>0.464</b> | 0.446                                 | 0.468        | 0.468        | 0.469        |
|                       | Avg | 0.431        | 0.448        | <b>0.420</b>                              | <b>0.432</b> | 0.427                                 | 0.434        | 0.456        | 0.467        |
| ETTh1<br>↓<br>ETTh1   | 96  | 0.295        | 0.346        | <b>0.286</b>                              | <b>0.341</b> | 0.290                                 | 0.346        | 0.290        | 0.348        |
|                       | 192 | 0.333        | 0.374        | <b>0.322</b>                              | <b>0.362</b> | 0.353                                 | 0.388        | 0.327        | 0.372        |
|                       | 336 | 0.370        | 0.398        | 0.362                                     | 0.418        | 0.362                                 | 0.412        | <b>0.357</b> | <b>0.392</b> |
|                       | 720 | 0.427        | 0.431        | 0.417                                     | 0.431        | 0.422                                 | 0.432        | <b>0.409</b> | <b>0.423</b> |
|                       | Avg | 0.356        | 0.387        | 0.347                                     | 0.388        | 0.357                                 | 0.395        | <b>0.346</b> | <b>0.384</b> |
| ETTh2<br>↓<br>ETTh1   | 96  | <b>0.295</b> | <b>0.346</b> | 0.299                                     | 0.348        | 0.301                                 | 0.352        | 0.322        | 0.347        |
|                       | 192 | 0.333        | 0.374        | <b>0.324</b>                              | 0.366        | 0.332                                 | <b>0.359</b> | 0.332        | 0.372        |
|                       | 336 | <b>0.370</b> | 0.398        | 0.374                                     | 0.401        | 0.389                                 | <b>0.382</b> | 0.394        | 0.391        |
|                       | 720 | 0.427        | 0.431        | 0.415                                     | <b>0.419</b> | 0.421                                 | 0.442        | <b>0.411</b> | 0.424        |
|                       | Avg | 0.356        | 0.387        | <b>0.353</b>                              | 0.386        | 0.361                                 | <b>0.384</b> | 0.365        | <b>0.384</b> |
| ETTh2<br>↓<br>ETTh1   | 96  | 0.295        | 0.346        | 0.299                                     | 0.351        | <b>0.285</b>                          | <b>0.336</b> | 0.297        | 0.348        |
|                       | 192 | 0.333        | 0.374        | 0.334                                     | 0.372        | 0.343                                 | <b>0.366</b> | <b>0.332</b> | 0.370        |
|                       | 336 | 0.370        | 0.398        | 0.362                                     | <b>0.388</b> | <b>0.360</b>                          | 0.399        | 0.364        | 0.393        |
|                       | 720 | 0.427        | 0.431        | 0.417                                     | 0.431        | 0.422                                 | 0.432        | <b>0.410</b> | <b>0.421</b> |
|                       | Avg | 0.356        | 0.387        | 0.353                                     | 0.386        | 0.353                                 | <b>0.383</b> | <b>0.351</b> | <b>0.383</b> |
| Weather<br>↓<br>ETTh1 | 96  | 0.295        | <b>0.346</b> | 0.322                                     | 0.361        | 0.309                                 | 0.354        | <b>0.294</b> | 0.354        |
|                       | 192 | 0.333        | 0.374        | 0.344                                     | 0.378        | 0.343                                 | 0.365        | <b>0.318</b> | <b>0.355</b> |
|                       | 336 | 0.370        | 0.398        | 0.371                                     | 0.399        | 0.401                                 | 0.411        | <b>0.361</b> | <b>0.397</b> |
|                       | 720 | 0.427        | 0.431        | 0.426                                     | <b>0.422</b> | <b>0.425</b>                          | 0.427        | 0.427        | 0.426        |
|                       | Avg | 0.356        | 0.387        | 0.366                                     | 0.390        | 0.370                                 | 0.389        | <b>0.350</b> | <b>0.383</b> |

Table 15: Full results for applying SimMTM to four advanced time series forecasting models under the in-domain setting. The gray mark represents negative transfer (↓).

| Models | Transformer [16] |       |         |              | Autoformer [21] |       |         |              | Ns Transformer [10] |       |         |              | PatchTST [11]                   |       |         |              |        |              |              |
|--------|------------------|-------|---------|--------------|-----------------|-------|---------|--------------|---------------------|-------|---------|--------------|---------------------------------|-------|---------|--------------|--------|--------------|--------------|
|        | Random init.     |       | +SimMTM |              | Random init.    |       | +SimMTM |              | Random init.        |       | +SimMTM |              | Random init. +Sub-serie Masking |       | +SimMTM |              |        |              |              |
| Metric | MSE              | MAE   | MSE     | MAE          | MSE             | MAE   | MSE     | MAE          | MSE                 | MAE   | MSE     | MAE          | MSE                             | MAE   | MSE     | MAE          | MSE    | MAE          |              |
| ETTh1  | 96               | 0.847 | 0.731   | 0.775        | 0.691           | 0.536 | 0.548   | 0.526        | 0.536               | 0.513 | 0.491   | 0.490        | 0.489                           | 0.375 | 0.399   | 0.366        | 0.398  | 0.373        | 0.399        |
|        | 192              | 1.084 | 0.841   | 0.918        | 0.763           | 0.543 | 0.551   | 0.523        | 0.548               | 0.534 | 0.504   | 0.517        | 0.499                           | 0.414 | 0.421   | 0.431        | 0.443  | 0.406        | 0.428        |
|        | 336              | 1.350 | 0.956   | 1.079        | 0.845           | 0.615 | 0.592   | 0.595        | 0.591               | 0.588 | 0.535   | 0.552        | 0.520                           | 0.431 | 0.436   | 0.450↓       | 0.456↓ | 0.422        | 0.431        |
|        | 720              | 1.069 | 0.817   | 0.935        | 0.761           | 0.599 | 0.600   | 0.600        | 0.597               | 0.643 | 0.616   | 0.614        | 0.598                           | 0.449 | 0.466   | 0.472↓       | 0.484↓ | 0.436        | 0.452        |
|        | Avg              | 1.088 | 0.836   | <b>0.927</b> | <b>0.761</b>    | 0.573 | 0.573   | <b>0.561</b> | <b>0.568</b>        | 0.570 | 0.537   | <b>0.543</b> | <b>0.527</b>                    | 0.417 | 0.431   | 0.430↓       | 0.445↓ | <b>0.409</b> | <b>0.428</b> |
| ETTh2  | 96               | 2.029 | 1.150   | 1.879        | 1.104           | 0.492 | 0.517   | 0.488        | 0.514               | 0.476 | 0.458   | 0.445        | 0.448                           | 0.274 | 0.336   | 0.284↓       | 0.343↓ | 0.274        | 0.337        |
|        | 192              | 6.785 | 2.099   | 5.054        | 1.771           | 0.556 | 0.551   | 0.547        | 0.549               | 0.512 | 0.493   | 0.482        | 0.502                           | 0.339 | 0.379   | 0.355↓       | 0.387↓ | 0.339        | 0.377        |
|        | 336              | 4.568 | 1.711   | 4.242        | 1.658           | 0.572 | 0.578   | 0.563        | 0.570               | 0.552 | 0.551   | 0.512        | 0.537                           | 0.331 | 0.380   | 0.379↓       | 0.411↓ | 0.327        | 0.381        |
|        | 720              | 3.030 | 1.486   | 2.815        | 1.413           | 0.580 | 0.588   | 0.575        | 0.588               | 0.562 | 0.560   | 0.531        | 0.568                           | 0.379 | 0.422   | 0.400↓       | 0.435↓ | 0.375        | 0.423        |
|        | Avg              | 4.103 | 1.612   | <b>3.498</b> | <b>1.487</b>    | 0.550 | 0.559   | <b>0.543</b> | <b>0.555</b>        | 0.526 | 0.516   | <b>0.493</b> | <b>0.514</b>                    | 0.331 | 0.379   | 0.355↓       | 0.394↓ | <b>0.329</b> | 0.379        |
| ETTh1  | 96               | 0.562 | 0.520   | 0.513        | 0.497           | 0.523 | 0.488   | 0.482        | 0.465               | 0.386 | 0.398   | 0.340        | 0.376                           | 0.290 | 0.342   | 0.289↓       | 0.344↓ | 0.288        | 0.343        |
|        | 192              | 0.810 | 0.668   | 0.686        | 0.606           | 0.543 | 0.498   | 0.499        | 0.476               | 0.459 | 0.444   | 0.423        | 0.445                           | 0.332 | 0.369   | 0.323        | 0.368  | 0.329        | 0.367        |
|        | 336              | 1.096 | 0.814   | 1.003        | 0.760           | 0.675 | 0.551   | 0.601        | 0.524               | 0.495 | 0.464   | 0.423        | 0.459                           | 0.366 | 0.392   | 0.353        | 0.387  | 0.361        | 0.387        |
|        | 720              | 1.136 | 0.813   | 1.032        | 0.790           | 0.720 | 0.528   | 0.629        | 0.555               | 0.585 | 0.516   | 0.539        | 0.499                           | 0.420 | 0.424   | 0.398        | 0.416  | 0.413        | 0.417        |
|        | Avg              | 0.901 | 0.704   | <b>0.809</b> | <b>0.663</b>    | 0.615 | 0.528   | <b>0.553</b> | <b>0.505</b>        | 0.481 | 0.456   | <b>0.431</b> | <b>0.445</b>                    | 0.352 | 0.382   | <b>0.341</b> | 0.379  | 0.348        | <b>0.378</b> |
| ETTh2  | 96               | 0.508 | 0.539   | 0.336        | 0.425           | 0.255 | 0.339   | 0.255        | 0.340               | 0.192 | 0.274   | 0.188        | 0.277                           | 0.165 | 0.255   | 0.166↓       | 0.256↓ | 0.163        | 0.253        |
|        | 192              | 0.972 | 0.721   | 0.713        | 0.610           | 0.281 | 0.340   | 0.276        | 0.332               | 0.280 | 0.339   | 0.277        | 0.336                           | 0.220 | 0.292   | 0.221↓       | 0.295↓ | 0.219        | 0.292        |
|        | 336              | 1.419 | 0.897   | 1.517        | 0.942           | 0.339 | 0.372   | 0.309        | 0.359               | 0.334 | 0.361   | 0.325        | 0.355                           | 0.278 | 0.329   | 0.278        | 0.333↓ | 0.275        | 0.328        |
|        | 720              | 3.598 | 1.445   | 2.720        | 1.254           | 0.422 | 0.419   | 0.420        | 0.410               | 0.417 | 0.413   | 0.414        | 0.412                           | 0.367 | 0.385   | 0.365        | 0.388↓ | 0.359        | 0.381        |
|        | Avg              | 1.624 | 0.901   | <b>1.322</b> | <b>0.808</b>    | 0.324 | 0.368   | <b>0.315</b> | <b>0.360</b>        | 0.306 | 0.347   | <b>0.301</b> | <b>0.345</b>                    | 0.258 | 0.317   | 0.258        | 0.318↓ | <b>0.254</b> | <b>0.313</b> |

Table 16: Full results for fine-tuning to limited data scenarios. We fine-tune the model pre-trained from ETTh2 to ETTh1 with different data proportions {10%, 25%, 50%, 75%, 100%}.

| Models | SimMTM  | Random init.              | Ti-MAE[8]   | TST[24]     | LaST[17]    | TF-C[25]    | CoST[20]    | TS2Vec[23]  |             |
|--------|---------|---------------------------|-------------|-------------|-------------|-------------|-------------|-------------|-------------|
| Metric | MSE MAE | MSE MAE                   | MSE MAE     | MSE MAE     | MSE MAE     | MSE MAE     | MSE MAE     | MSE MAE     |             |
| ETTh2  | 10%     | <b>0.591</b> <b>0.523</b> | 0.653 0.558 | 0.660 0.517 | 0.783 0.588 | 0.645 0.507 | 0.799 0.783 | 0.784 0.604 | 0.655 0.550 |
|        | 25%     | <b>0.535</b> <b>0.490</b> | 0.632 0.502 | 0.594 0.518 | 0.641 0.578 | 0.610 0.611 | 0.736 0.725 | 0.624 0.539 | 0.632 0.543 |
| ETTh1  | ↓ 50%   | <b>0.491</b> <b>0.473</b> | 0.512 0.479 | 0.550 0.504 | 0.525 0.509 | 0.540 0.513 | 0.731 0.704 | 0.540 0.499 | 0.599 0.526 |
|        | 75%     | <b>0.466</b> <b>0.458</b> | 0.499 0.488 | 0.475 0.465 | 0.516 0.488 | 0.479 0.470 | 0.697 0.689 | 0.494 0.475 | 0.577 0.534 |
|        | 100%    | <b>0.415</b> <b>0.430</b> | 0.431 0.448 | 0.466 0.456 | 0.469 0.459 | 0.443 0.471 | 0.635 0.634 | 0.428 0.433 | 0.517 0.486 |

Table 17: In- and cross-domain settings of classification, where **all the baselines are based on the encoder utilized in their original papers**. For in-domain setting, we pre-train and fine-tune on the same dataset: Epilepsy. For cross-domain setting, we pre-train the model on SleepEEG and then fine-tune it on different datasets: Epilepsy, FD-B, Gesture, and EMG.

| Scenarios    | Models        | Accuracy (%)  | Precision (%) | Recall (%)   | F1 (%)       | Avg (%)      |              |
|--------------|---------------|---------------|---------------|--------------|--------------|--------------|--------------|
| In-Domain    |               | Random init.  | 89.83         | 92.13        | 74.47        | 79.59        | 84.00        |
|              | Epilepsy      | TS2vec [23]   | 92.17         | 93.84        | 81.19        | 85.71        | 88.23        |
|              |               | CoST[20]      | 88.07         | 91.58        | 66.05        | 69.11        | 78.70        |
|              | Epilepsy      | LaST [17]     | 92.11         | 93.12        | 81.47        | 85.74        | 88.11        |
|              |               | TST [24]      | 80.21         | 40.11        | 50.00        | 44.51        | 53.71        |
|              |               | Ti-MAE [8]    | 90.09         | 93.90        | 77.24        | 78.21        | 84.86        |
|              |               | TF-C [25]     | 93.96         | 94.87        | 85.82        | 89.46        | 91.03        |
|              |               | <b>SimMTM</b> | <b>94.75</b>  | <b>95.60</b> | <b>89.93</b> | <b>91.41</b> | <b>92.92</b> |
| Cross-Domain |               | Random init.  | 89.83         | 92.13        | 74.47        | 79.59        | 84.00        |
|              | SleepEEG      | TS2vec [23]   | 93.95         | 90.59        | 90.39        | 90.45        | 91.35        |
|              |               | CoST[20]      | 88.40         | 88.20        | 72.34        | 76.88        | 81.45        |
|              | Epilepsy      | LaST [17]     | 86.46         | 90.77        | 66.35        | 70.67        | 78.56        |
|              |               | TST [24]      | 80.21         | 40.11        | 50.00        | 44.51        | 53.71        |
|              |               | Ti-MAE [8]    | 89.71         | 72.36        | 67.47        | 68.55        | 74.52        |
|              |               | TF-C [25]     | 94.95         | <b>94.56</b> | 89.08        | 91.49        | 92.52        |
|              |               | <b>SimMTM</b> | <b>95.49</b>  | 93.36        | <b>92.28</b> | <b>92.81</b> | <b>93.49</b> |
|              |               | Random init.  | 47.36         | 48.29        | 52.35        | 49.11        | 49.28        |
|              | SleepEEG      | TS2vec [23]   | 47.90         | 43.39        | 48.42        | 43.89        | 45.90        |
|              |               | CoST[20]      | 47.06         | 38.79        | 38.42        | 34.79        | 39.76        |
|              | FD-B          | LaST [17]     | 46.67         | 43.90        | 47.71        | 45.17        | 45.86        |
|              |               | TST [24]      | 46.40         | 41.58        | 45.50        | 41.34        | 43.71        |
|              |               | Ti-MAE [8]    | 60.88         | 66.98        | 68.94        | 66.56        | 65.84        |
|              | TF-C [25]     | 69.38         | <b>75.59</b>  | 72.02        | 74.87        | 72.97        |              |
|              | <b>SimMTM</b> | <b>69.40</b>  | 74.18         | <b>76.41</b> | <b>75.11</b> | <b>73.78</b> |              |
|              | Random init.  | 42.19         | 47.51         | 49.63        | 48.86        | 47.05        |              |
| SleepEEG     | TS2vec [23]   | 69.17         | 65.45         | 68.54        | 65.70        | 67.22        |              |
|              | CoST[20]      | 68.33         | 65.30         | 68.33        | 66.42        | 67.09        |              |
| Gesture      | LaST [17]     | 64.17         | 70.36         | 64.17        | 58.76        | 64.37        |              |
|              | TST [24]      | 69.17         | 66.60         | 69.17        | 66.01        | 67.74        |              |
|              | Ti-MAE [8]    | 71.88         | 70.35         | 76.75        | 68.37        | 71.84        |              |
|              | TF-C [25]     | 76.42         | 77.31         | 74.29        | 75.72        | 75.94        |              |
|              | <b>SimMTM</b> | <b>80.00</b>  | <b>79.03</b>  | <b>80.00</b> | <b>78.67</b> | <b>79.43</b> |              |
|              | Random init.  | 77.80         | 59.09         | 66.67        | 62.38        | 66.49        |              |
| SleepEEG     | TS2vec [23]   | 78.54         | 80.40         | 67.85        | 67.66        | 73.61        |              |
|              | CoST[20]      | 53.65         | 49.07         | 42.10        | 35.27        | 45.02        |              |
| EMG          | LaST [17]     | 66.34         | 79.34         | 63.33        | 72.55        | 70.39        |              |
|              | TST [24]      | 78.34         | 77.11         | 80.30        | 68.89        | 76.16        |              |
|              | Ti-MAE [8]    | 69.99         | 70.25         | 63.44        | 70.89        | 68.64        |              |
|              | TF-C [25]     | 81.71         | 72.65         | 81.59        | 76.83        | 78.20        |              |
|              | <b>SimMTM</b> | <b>97.56</b>  | <b>98.33</b>  | <b>98.04</b> | <b>98.14</b> | <b>98.02</b> |              |

Table 18: In- and cross-domain settings of classification **based on the unified 1-D ResNet encoder**. For in-domain setting, we pre-train and fine-tune on the same dataset: Epilepsy. For cross-domain setting, we pre-train on SleepEEG and fine-tune on different domain datasets: Epilepsy, FD-B, Gesture, and EMG.

| Scenarios                | Models                    | Accuracy (%)  | Precision (%) | Recall (%)   | F1 (%)       | Avg (%)      |              |
|--------------------------|---------------------------|---------------|---------------|--------------|--------------|--------------|--------------|
| In-Domain                | Epilepsy<br>↓<br>Epilepsy | Random init.  | 89.83         | 92.13        | 74.47        | 79.59        | 84.00        |
|                          |                           | TS2vec [23]   | 92.33         | 94.53        | 81.11        | 86.33        | 88.58        |
|                          |                           | CoST[20]      | 92.35         | 94.73        | 81.16        | 85.92        | 88.54        |
|                          |                           | LaST [17]     | -             | -            | -            | -            | -            |
|                          |                           | TST [24]      | 80.89         | 90.38        | 51.73        | 48.01        | 67.75        |
|                          |                           | Ti-MAE [8]    | 80.34         | 90.16        | 50.33        | 45.20        | 66.51        |
|                          |                           | TF-C [25]     | 93.96         | 94.87        | 85.82        | 89.46        | 91.03        |
|                          |                           | <b>SimMTM</b> | <b>94.75</b>  | <b>95.60</b> | <b>89.93</b> | <b>91.41</b> | <b>92.92</b> |
| Cross-Domain             | SleepEEG<br>↓<br>Epilepsy | Random init.  | 89.83         | 92.13        | 74.47        | 79.59        | 84.00        |
|                          |                           | TS2vec [23]   | 94.46         | 91.99        | 90.28        | 91.10        | 91.95        |
|                          |                           | CoST[20]      | 93.66         | 91.39        | 88.08        | 89.60        | 90.68        |
|                          |                           | LaST [17]     | -             | -            | -            | -            | -            |
|                          |                           | TST [24]      | 82.89         | 86.15        | 79.02        | 80.44        | 82.13        |
|                          |                           | Ti-MAE [8]    | 73.45         | 72.56        | 65.34        | 77.20        | 72.14        |
|                          |                           | TF-C [25]     | 94.95         | <b>94.56</b> | 89.08        | 91.49        | 92.52        |
|                          |                           | <b>SimMTM</b> | <b>95.49</b>  | 93.36        | <b>92.28</b> | <b>92.81</b> | <b>93.49</b> |
|                          | SleepEEG<br>↓<br>FD-B     | Random init.  | 47.36         | 48.29        | 52.35        | 49.11        | 49.28        |
|                          |                           | TS2vec [23]   | 60.74         | 59.60        | 64.27        | 61.07        | 61.42        |
|                          |                           | CoST[20]      | 54.82         | 51.92        | 63.30        | 54.34        | 56.09        |
|                          |                           | LaST [17]     | -             | -            | -            | -            | -            |
|                          |                           | TST [24]      | 65.57         | 70.05        | 67.57        | 64.41        | 66.90        |
|                          |                           | Ti-MAE [8]    | 67.98         | 62.83        | 64.45        | 63.36        | 64.66        |
|                          |                           | TF-C [25]     | 69.38         | <b>75.59</b> | 72.02        | 74.87        | 72.97        |
| <b>SimMTM</b>            |                           | <b>69.40</b>  | 74.18         | <b>76.41</b> | <b>75.11</b> | <b>73.78</b> |              |
| SleepEEG<br>↓<br>Gesture | Random Init.              | 42.19         | 47.51         | 49.63        | 48.86        | 47.05        |              |
|                          | TS2vec [23]               | 73.33         | 70.88         | 73.33        | 71.56        | 72.27        |              |
|                          | CoST[20]                  | 73.33         | 74.37         | 73.33        | 71.16        | 73.04        |              |
|                          | LaST [17]                 | -             | -             | -            | -            | -            |              |
|                          | TST [24]                  | 75.12         | 76.05         | 67.74        | 73.24        | 73.04        |              |
|                          | Ti-MAE [8]                | 75.54         | 69.32         | 72.42        | 69.32        | 71.65        |              |
|                          | TF-C [25]                 | 76.42         | 77.31         | 74.29        | 75.72        | 75.94        |              |
|                          | <b>SimMTM</b>             | <b>80.00</b>  | <b>79.03</b>  | <b>80.00</b> | <b>78.67</b> | <b>79.43</b> |              |
| SleepEEG<br>↓<br>EMG     | Random init.              | 77.80         | 59.09         | 66.67        | 62.38        | 66.49        |              |
|                          | TS2vec [23]               | 80.92         | 69.63         | 67.65        | 67.90        | 71.52        |              |
|                          | CoST[20]                  | 73.17         | 70.47         | 69.84        | 70.00        | 70.87        |              |
|                          | LaST [17]                 | -             | -             | -            | -            | -            |              |
|                          | TST [24]                  | 75.89         | 74.67         | 80.66        | 78.48        | 77.43        |              |
|                          | Ti-MAE [8]                | 63.52         | 67.77         | 70.55        | 58.32        | 65.04        |              |
|                          | TF-C [25]                 | 81.71         | 72.65         | 81.59        | 76.83        | 78.20        |              |
|                          | <b>SimMTM</b>             | <b>97.56</b>  | <b>98.33</b>  | <b>98.04</b> | <b>98.14</b> | <b>98.02</b> |              |



Table 19: Full ablation studies for in-domain and cross-domain settings of classification. Under the Avg metric, the standard deviations of SimMTM are within 0.2% for Epilepsy, within 0.5% for FD-B, within 0.6% for Gesture, and within 0.1% for EMG.

| Scenarios                 |                                           | Accuracy (%) | Precision (%) | Recall (%)   | F1 (%)       | Avg (%)      |
|---------------------------|-------------------------------------------|--------------|---------------|--------------|--------------|--------------|
| Epilepsy<br>↓<br>Epilepsy | Random init.                              | 89.83        | 92.13         | 74.47        | 79.59        | 84.00        |
|                           | W/o $\mathcal{L}_{\text{reconstruction}}$ | 93.80        | <b>96.11</b>  | 86.11        | 89.45        | 91.37        |
|                           | W/o $\mathcal{L}_{\text{constraint}}$     | 90.99        | 92.81         | 79.86        | 84.13        | 86.95        |
|                           | <b>SimMTM</b>                             | <b>94.75</b> | 95.60         | <b>89.93</b> | <b>91.41</b> | <b>92.92</b> |
| SleepEEG<br>↓<br>Epilepsy | Random init.                              | 89.83        | 92.13         | 74.47        | 79.59        | 84.00        |
|                           | W/o $\mathcal{L}_{\text{reconstruction}}$ | 94.54        | <b>93.87</b>  | 88.46        | 90.84        | 91.93        |
|                           | W/o $\mathcal{L}_{\text{constraint}}$     | 91.73        | 90.57         | 82.21        | 85.53        | 87.51        |
|                           | <b>SimMTM</b>                             | <b>95.49</b> | 93.36         | <b>92.28</b> | <b>92.81</b> | <b>93.49</b> |
| SleepEEG<br>↓<br>FD-B     | Random init.                              | 47.36        | 48.29         | 52.35        | 49.11        | 49.28        |
|                           | W/o $\mathcal{L}_{\text{reconstruction}}$ | 66.11        | 67.97         | 74.70        | 70.01        | 69.70        |
|                           | W/o $\mathcal{L}_{\text{constraint}}$     | 53.71        | 69.48         | 62.67        | 50.86        | 59.18        |
|                           | <b>SimMTM</b>                             | <b>69.40</b> | <b>74.18</b>  | <b>76.41</b> | <b>75.11</b> | <b>73.78</b> |
| SleepEEG<br>↓<br>Gesture  | Random init.                              | 42.19        | 47.51         | 49.63        | 48.86        | 47.05        |
|                           | W/o $\mathcal{L}_{\text{reconstruction}}$ | 78.50        | 79.01         | 78.50        | 77.17        | 78.30        |
|                           | W/o $\mathcal{L}_{\text{constraint}}$     | 76.67        | 74.91         | 76.67        | 74.80        | 75.76        |
|                           | <b>SimMTM</b>                             | <b>80.00</b> | <b>79.03</b>  | <b>80.00</b> | <b>78.67</b> | <b>79.43</b> |
| SleepEEG<br>↓<br>EMG      | Random init.                              | 77.80        | 59.09         | 66.67        | 62.38        | 66.49        |
|                           | W/o $\mathcal{L}_{\text{reconstruction}}$ | 90.24        | 94.20         | 78.04        | 81.53        | 86.00        |
|                           | W/o $\mathcal{L}_{\text{constraint}}$     | 85.37        | 89.97         | 69.62        | 70.74        | 78.93        |
|                           | <b>SimMTM</b>                             | <b>97.56</b> | <b>98.33</b>  | <b>98.04</b> | <b>98.14</b> | <b>98.02</b> |

## 165 References

- 166 [1] Ralph G Andrzejak, Klaus Lehnertz, Florian Mormann, Christoph Rieke, Peter David, and Christian E  
167 Elger. Indications of nonlinear deterministic and finite-dimensional structures in time series of brain  
168 electrical activity: Dependence on recording region and brain state. *Physical Review E*, 2001.
- 169 [2] Jacob Devlin, Ming-Wei Chang, Kenton Lee, and Kristina Toutanova. BERT: Pre-training of Deep  
170 Bidirectional Transformers for Language Understanding. In *NAACL*, 2018.
- 171 [3] Tianyu Gao, Adam Fisch, and Danqi Chen. Making pre-trained language models better few-shot learners.  
172 In *IJCNLP*, 2020.
- 173 [4] Kaiming He, Xinlei Chen, Saining Xie, Yanghao Li, Piotr Dollár, and Ross Girshick. Masked autoencoders  
174 are scalable vision learners. In *CVPR*, 2022.
- 175 [5] Kaiming He, X. Zhang, Shaoqing Ren, and Jian Sun. Deep residual learning for image recognition. In  
176 *CVPR*, 2016.
- 177 [6] Bob Kemp, Aeilko H Zwinderman, Bert Tuk, Hilbert AC Kamphuisen, and Josefien JL Oberye. Analysis  
178 of a sleep-dependent neuronal feedback loop: the slow-wave microcontinuity of the eeg. *TBME*, 2000.
- 179 [7] Christian Lessmeier, James Kuria Kimotho, Detmar Zimmer, and Walter Sextro. Condition monitoring of  
180 bearing damage in electromechanical drive systems by using motor current signals of electric motors: A  
181 benchmark data set for data-driven classification. In *PHM*, 2016.
- 182 [8] Zhe Li, Zhongwen Rao, Lujia Pan, Pengyun Wang, and Zenglin Xu. Ti-mae: Self-supervised masked time  
183 series autoencoders. *arXiv preprint arXiv:2301.08871*, 2023.

- 184 [9] Jiayang Liu, Lin Zhong, Jehan Wickramasuriya, and Venu Vasudevan. uwave: Accelerometer-based  
185 personalized gesture recognition and its applications. In *PMC*, 2009.
- 186 [10] Yong Liu, Haixu Wu, Jianmin Wang, and Mingsheng Long. Non-stationary transformers: Exploring the  
187 stationarity in time series forecasting. In *NeurIPS*, 2022.
- 188 [11] Yuqi Nie, Nam H Nguyen, Phanwadee Sinthong, and Jayant Kalagnanam. A time series is worth 64 words:  
189 Long-term forecasting with transformers. In *ICLR*, 2023.
- 190 [12] Adam Paszke, S. Gross, Francisco Massa, A. Lerer, James Bradbury, Gregory Chanan, Trevor Killeen,  
191 Z. Lin, N. Gimselshein, L. Antiga, Alban Desmaison, Andreas Köpf, Edward Yang, Zach DeVito, Martin  
192 Raison, Alykhan Tejani, Sasank Chilamkurthy, Benoit Steiner, Lu Fang, Junjie Bai, and Soumith Chintala.  
193 Pytorch: An imperative style, high-performance deep learning library. In *NeurIPS*, 2019.
- 194 [13] PeMS. Traffic Dataset. <http://pems.dot.ca.gov/>.
- 195 [14] PhysioToolkit PhysioBank. Physionet: components of a new research resource for complex physiologic  
196 signals. *Circulation*, 2000.
- 197 [15] UCI. UCI Electricity Load Time Series Dataset. [https://archive.ics.uci.edu/ml/datasets/  
198 ElectricityLoadDiagrams20112014](https://archive.ics.uci.edu/ml/datasets/ElectricityLoadDiagrams20112014).
- 199 [16] Ashish Vaswani, Noam Shazeer, Niki Parmar, Jakob Uszkoreit, Llion Jones, Aidan N Gomez, Łukasz  
200 Kaiser, and Illia Polosukhin. Attention is all you need. In *NeurIPS*, 2017.
- 201 [17] Zhiyuan Wang, Xovee Xu, Weifeng Zhang, Goce Trajcevski, Ting Zhong, and Fan Zhou. Learning latent  
202 seasonal-trend representations for time series forecasting. In *NeurIPS*, 2022.
- 203 [18] Wetterstation. Weather Dataset. <https://www.bgc-jena.mpg.de/wetter/>.
- 204 [19] Alexander Wettig, Tianyu Gao, Zexuan Zhong, and Danqi Chen. Should you mask 15% in masked  
205 language modeling? In *EACL*, 2023.
- 206 [20] Gerald Woo, Chenghao Liu, Doyen Sahoo, Akshat Kumar, and Steven Hoi. Cost: Contrastive learning of  
207 disentangled seasonal-trend representations for time series forecasting. In *ICLR*, 2022.
- 208 [21] Haixu Wu, Jiehui Xu, Jianmin Wang, and Mingsheng Long. Autoformer: Decomposition transformers  
209 with auto-correlation for long-term series forecasting. In *NeurIPS*, 2021.
- 210 [22] Zhenda Xie, Zheng Zhang, Yue Cao, Yutong Lin, Jianmin Bao, Zhuliang Yao, Qi Dai, and Han Hu.  
211 Simmim: A simple framework for masked image modeling. In *CVPR*, 2022.
- 212 [23] Zhihan Yue, Yujing Wang, Juanyong Duan, Tianmeng Yang, Congrui Huang, Yunhai Tong, and Bixiong  
213 Xu. TS2Vec: Towards Universal Representation of Time Series. In *AAAI*, 2022.
- 214 [24] George Zerveas, Srideepika Jayaraman, Dhaval Patel, Anuradha Bhamidipaty, and Carsten Eickhoff. A  
215 transformer-based framework for multivariate time series representation learning. In *SIGKDD*, 2021.
- 216 [25] Xiang Zhang, Ziyuan Zhao, Theodoros Tsiligkaridis, and Marinka Zitnik. Self-supervised contrastive  
217 pre-training for time series via time-frequency consistency. In *NeurIPS*, 2022.
- 218 [26] Haoyi Zhou, Shanghang Zhang, Jieqi Peng, Shuai Zhang, Jianxin Li, Hui Xiong, and Wancai Zhang.  
219 Informer: Beyond efficient transformer for long sequence time-series forecasting. In *AAAI*, 2021.
